# Supplementary material for: Pd-catalyzed decarboxylative 1,4-addition reactions of benzofuran-based azadienes with allyl phenyl carbonates
Source: Royal Society of Chemistry journal article supplement (doi:10.1039/d3ob00968h), 2023-01-01

# Supporting Information

## Pd-Catalyzed Decarboxylative 1,4-Addition Reactions of Benzofuran-based Azadienes with Allyl Phenyl Carbonates

Lu-Yu Cai<sup>a</sup>, Xiu-Qing Song<sup>b</sup>, Kuo Wang<sup>a</sup>, Yue Zhang<sup>a</sup>, Hong-Wu Zhao<sup>a\*</sup>

<sup>a</sup> College of Life Science and Bio-engineering, Beijing University of Technology, No.100 Pingleyuan, Chaoyang District, Beijing 100124, P. R. China

<sup>b</sup> Large-scale Instruments and Equipments Sharing Platform, Beijing University of Technology, No.100 Pingleyuan, Chaoyang District, Beijing 100124, P. R. China

### Table of Contents

|                                                                          |   |
|--------------------------------------------------------------------------|---|
| 1. General Information .....                                             | 2 |
| 2. X-Ray Crystallographic Analysis of Product <b>3aa</b> .....           | 2 |
| 3. References .....                                                      | 3 |
| 4. <sup>1</sup> H- <sup>13</sup> C HSQC and DEPT-135 of <b>3aa</b> ..... | 4 |
| 5. Variable Temperature <sup>1</sup> H NMR Spectra of <b>3aa</b> .....   | 5 |
| 6. NMR Spectra of Products <b>3-5</b> .....                              | 6 |

## 1. General Information

Proton ( $^1\text{H}$ ) and carbon ( $^{13}\text{C}$ ) NMR spectra were recorded on 400 MHz instrument (400 MHz for  $^1\text{H}$  NMR, 100 MHz for  $^{13}\text{C}$  NMR) and calibrated using tetramethylsilane (TMS) as internal reference. High resolution mass spectra (HRMS) were recorded under electrospray ionization (ESI) conditions. The melting point of compounds was determined by a melting point instrument. Flash column chromatography was performed on silica gel (0.035-0.070 mm) using compressed air. Thin layer chromatography (TLC) was carried out on 0.25 mm SDS silica gel coated glass plates (60F254). Eluted plates were visualized using a 254 nm UV lamp. Unless otherwise indicated, all reagents were commercially available and used without further purification. All solvents were distilled from the appropriate drying agents immediately before using. Allyl phenyl carbonates **1a–1k** were synthesized according to the reported procedures.<sup>1</sup> Benzofuran-bases azadienes **2a–2g** were prepared according to literature procedures.<sup>2</sup>

## 2. X-Ray Crystallographic Analysis of Product **3aa**

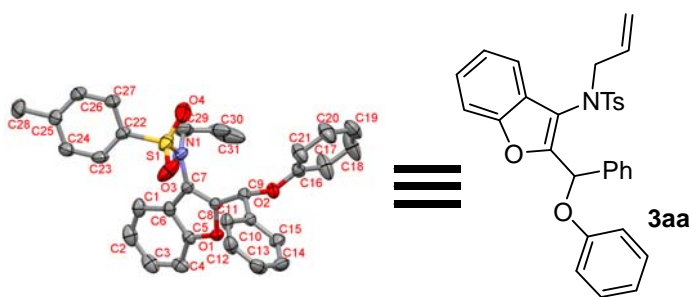

**Figure 1.** X-ray single crystal structure of **3aa** (with thermal ellipsoids shown at the 50% probability level)

|                       |                                                 |
|-----------------------|-------------------------------------------------|
| Identification code   | <b>3aa</b>                                      |
| Empirical formula     | $\text{C}_{31}\text{H}_{27}\text{NO}_4\text{S}$ |
| Formula weight        | 509.59                                          |
| Temperature/K         | 113.15                                          |
| Crystal system        | triclinic                                       |
| Space group           | P-1                                             |
| a/Å                   | 10.3471(7)                                      |
| b/Å                   | 11.5677(8)                                      |
| c/Å                   | 12.0428(7)                                      |
| $\alpha/^\circ$       | 83.169(5)                                       |
| $\beta/^\circ$        | 72.223(6)                                       |
| $\gamma/^\circ$       | 71.119(6)                                       |
| Volume/Å <sup>3</sup> | 1298.42(16)                                     |
| Z                     | 2                                               |

|                                                |                                                               |
|------------------------------------------------|---------------------------------------------------------------|
| $\rho_{\text{calc}}/\text{cm}^3$               | 1.303                                                         |
| $\mu/\text{mm}^{-1}$                           | 0.162                                                         |
| F(000)                                         | 536.0                                                         |
| Crystal size/ $\text{mm}^3$                    | $0.24 \times 0.22 \times 0.18$                                |
| Radiation                                      | MoK $\alpha$ ( $\lambda = 0.71073$ )                          |
| $2\Theta$ range for data collection/ $^\circ$  | 3.552 to 65.768                                               |
| Index ranges                                   | $-14 \leq h \leq 15, -16 \leq k \leq 17, -17 \leq l \leq 18$  |
| Reflections collected                          | 19778                                                         |
| Independent reflections                        | 8711 [ $R_{\text{int}} = 0.0395, R_{\text{sigma}} = 0.0626$ ] |
| Data/restraints/parameters                     | 8711/0/336                                                    |
| Goodness-of-fit on $F^2$                       | 1.042                                                         |
| Final R indexes [ $I \geq 2\sigma(I)$ ]        | $R_1 = 0.0761, wR_2 = 0.1830$                                 |
| Final R indexes [all data]                     | $R_1 = 0.1322, wR_2 = 0.2166$                                 |
| Largest diff. peak/hole / $e \text{ \AA}^{-3}$ | 0.73/-0.52                                                    |

### 3. References

- (1) a) H. Chen, X. Jia, Y. Yu, Q. Qian and H. Gong, *Angew. Chem. Int. Ed.*, 2017, **56**, 13103-13106. b) R. Trivedi and J. A. Tunge, *Org. Lett.*, 2009, **11**, 5650-5652.
- (2) R.-J. Yan, B.-X. Liu, B.-X. Xiao, W. Du, Y.-C. Chen, *Org. Lett.* 2020, **22**, 4240-4244.



## 5. Variable Temperature $^1\text{H}$ NMR Spectra of 3aa

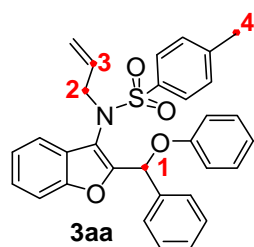

Solvent: DMSO- $d_6$

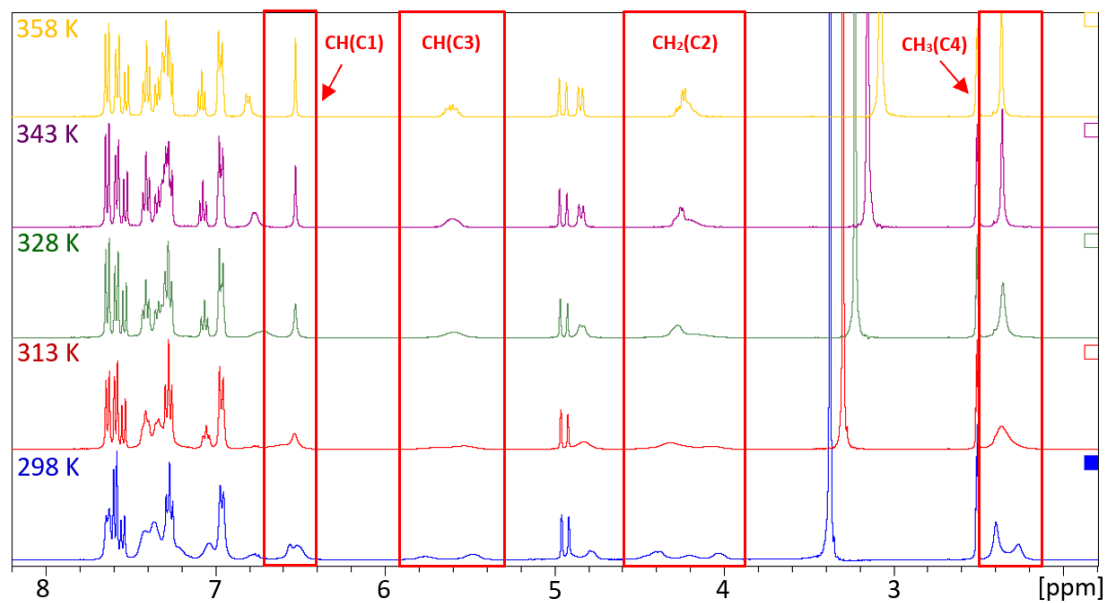

## 6. NMR Spectra of Products 3-5

### *N*-allyl-4-methyl-*N*-(2-(phenoxy(phenyl)methyl)benzofuran-3-yl)benzenesulfonamide (3aa):

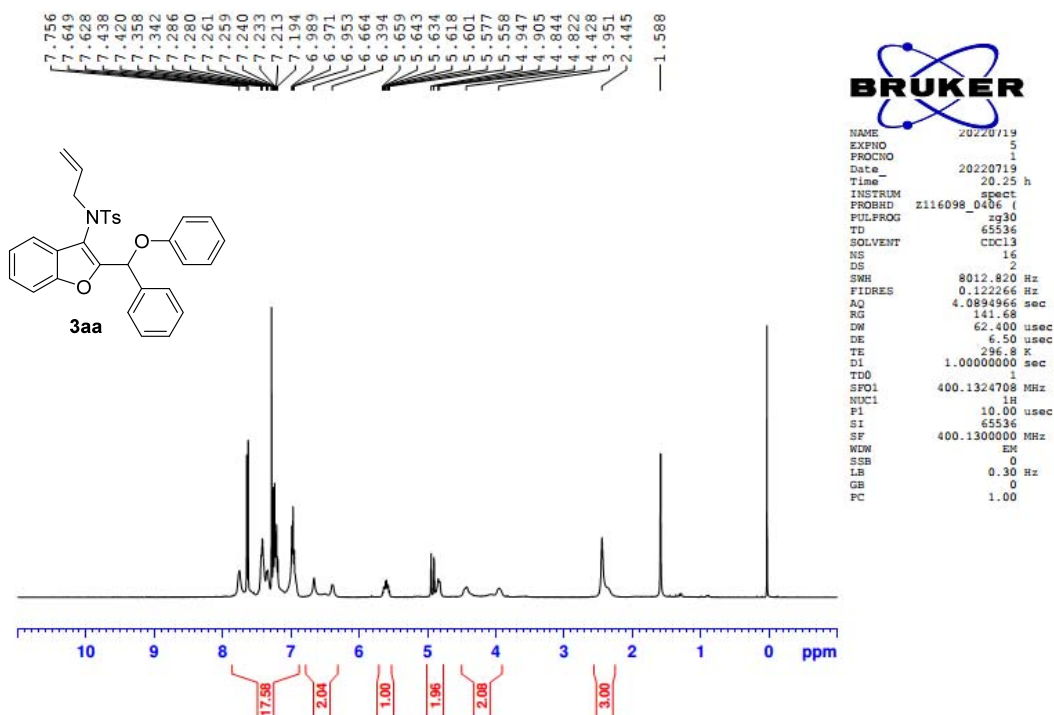

### *N*-allyl-4-methyl-*N*-(2-(phenoxy(phenyl)methyl)benzofuran-3-yl)benzenesulfonamide (3aa):

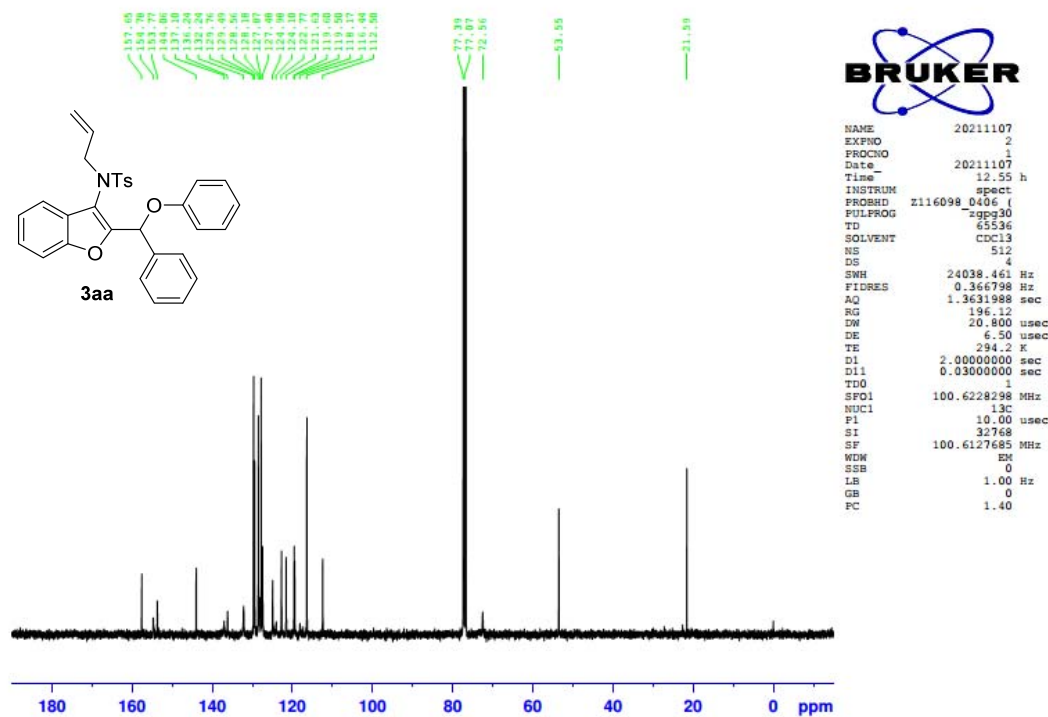



***N*-allyl-4-methyl-*N*-(2-(phenoxy(*m*-tolyl)methyl)benzofuran-3-yl)benzenesulfonamide (3ac):**

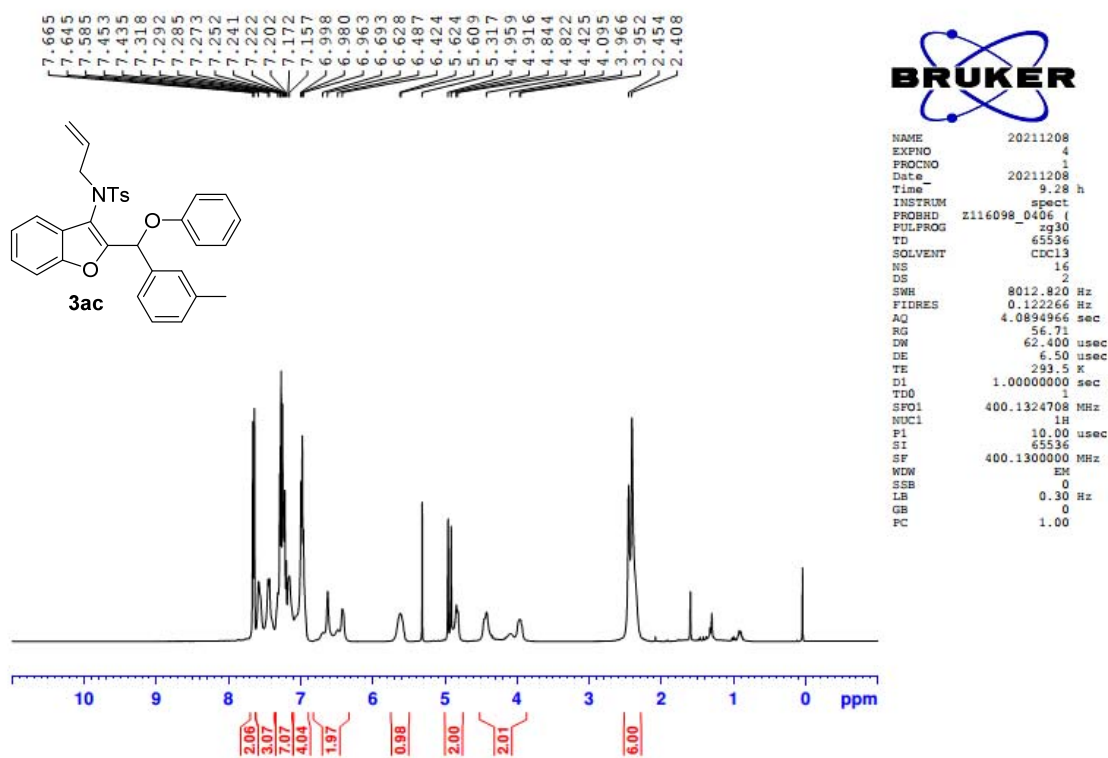

***N*-allyl-4-methyl-*N*-(2-(phenoxy(*m*-tolyl)methyl)benzofuran-3-yl)benzenesulfonamide (3ac):**

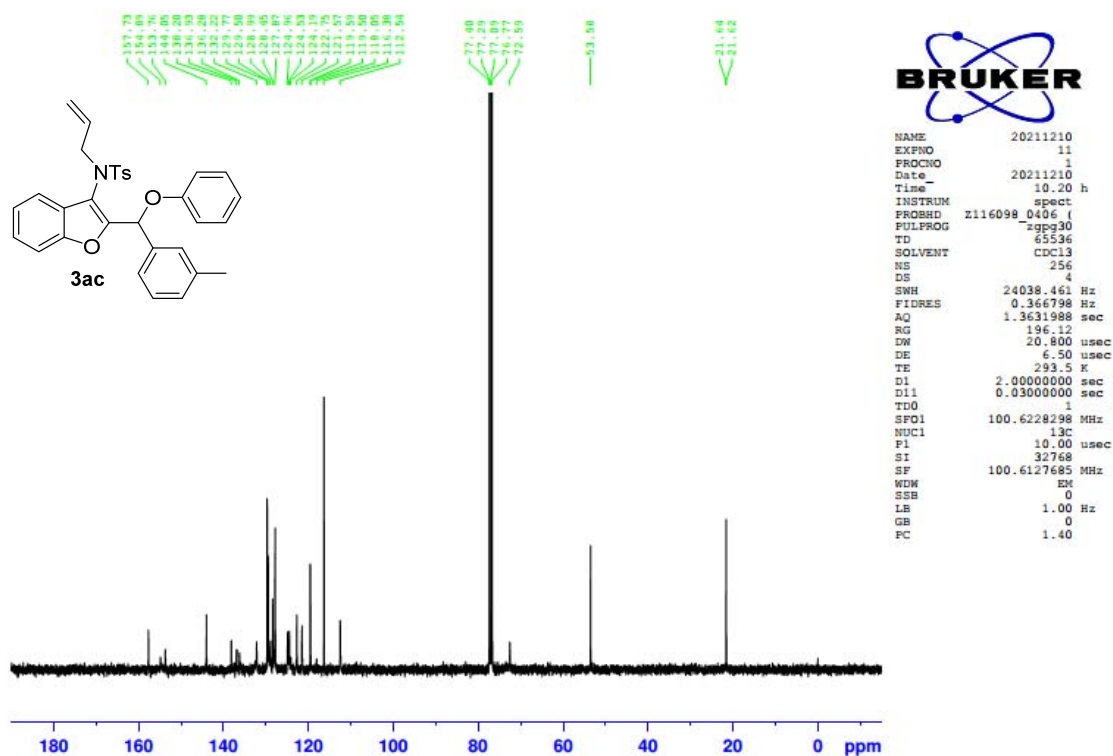





***N*-allyl-4-methyl-*N*-(2-((3-nitrophenyl)(phenoxy)methyl)benzofuran-3-yl)benzenesulfonamide (3ae):**

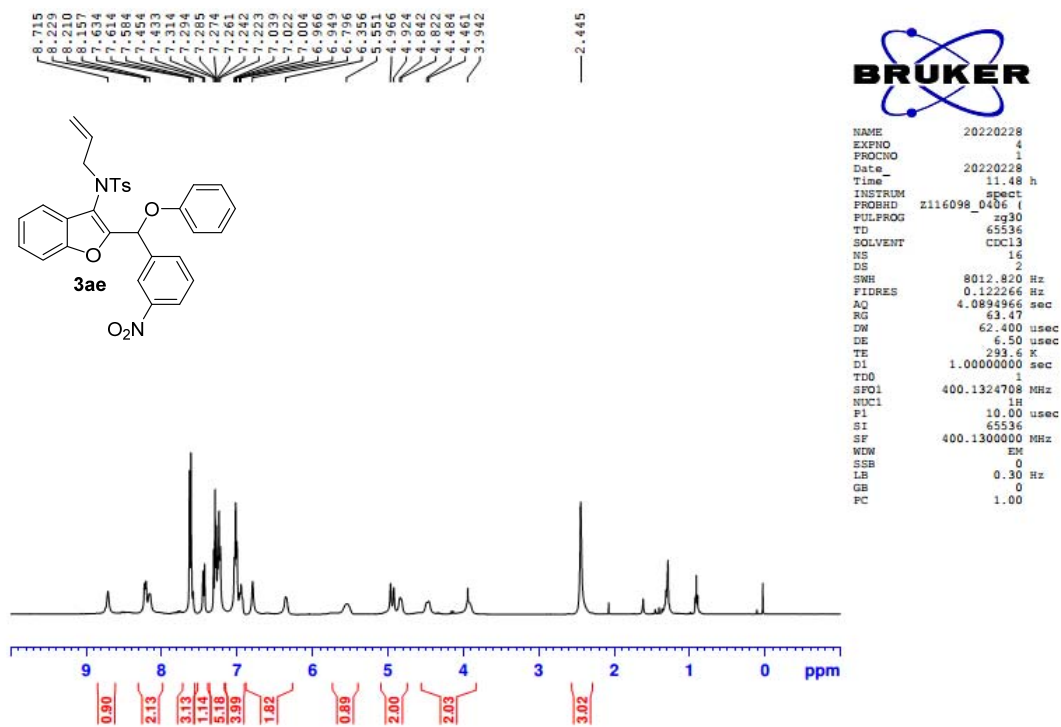

***N*-allyl-4-methyl-*N*-(2-((3-nitrophenyl)(phenoxy)methyl)benzofuran-3-yl)benzenesulfonamide (3ae):**

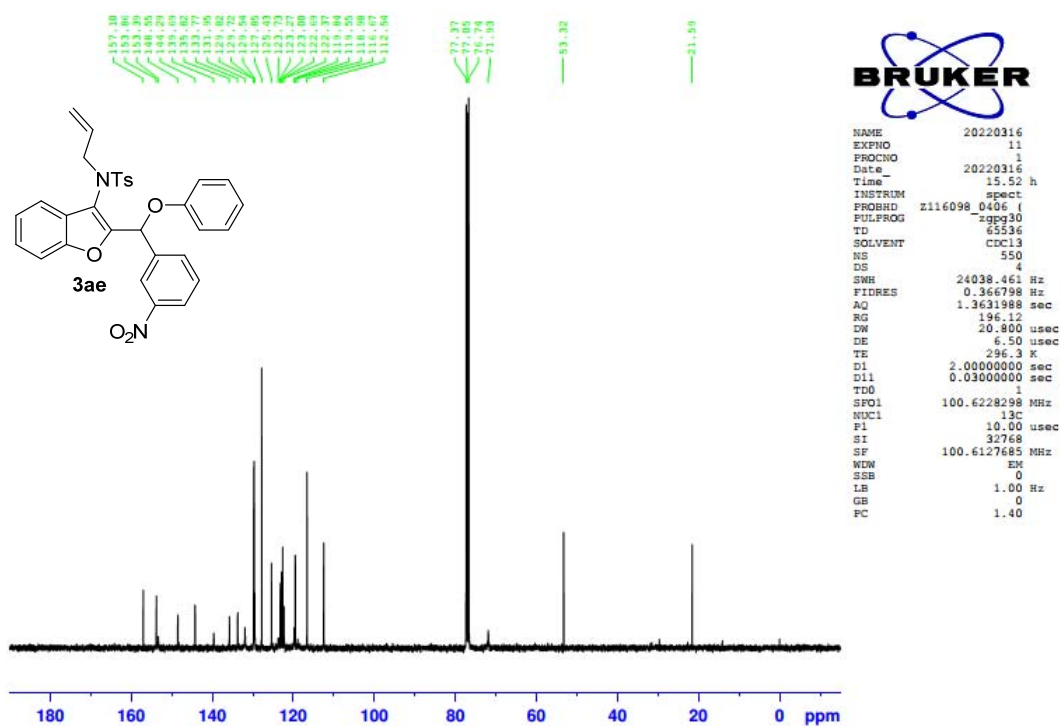

***N*-allyl-4-methyl-*N*-(5-methyl-2-(phenoxy(phenyl)methyl)benzofuran-3-yl)benzenesulfonamide (3af):**

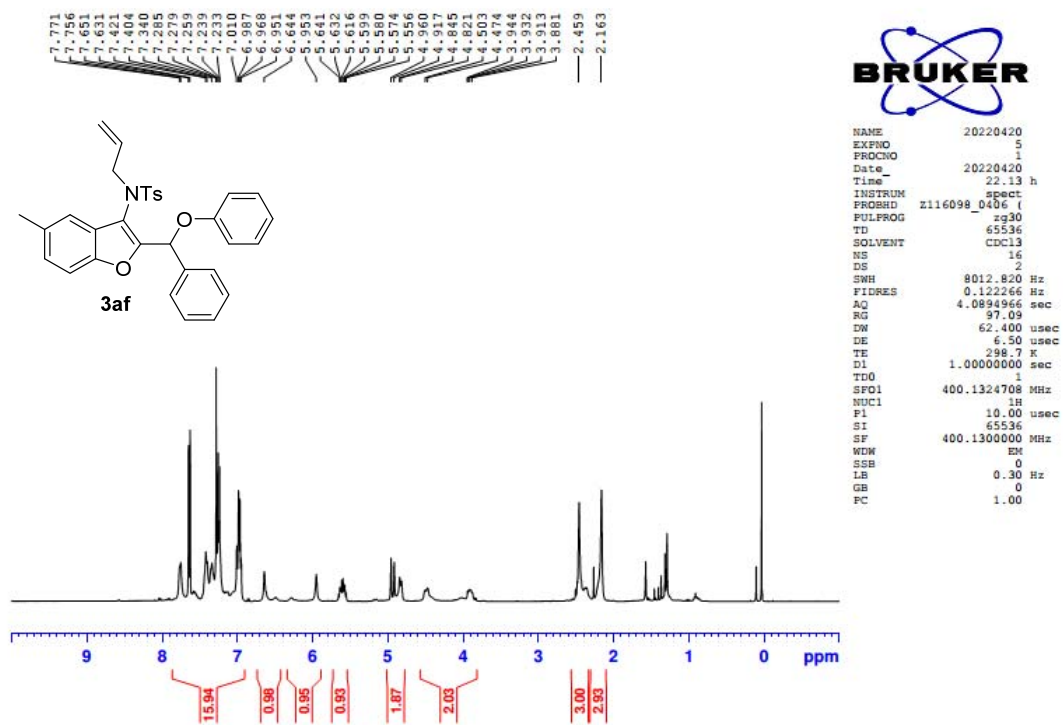

***N*-allyl-4-methyl-*N*-(5-methyl-2-(phenoxy(phenyl)methyl)benzofuran-3-yl)benzenesulfonamide (3af):**

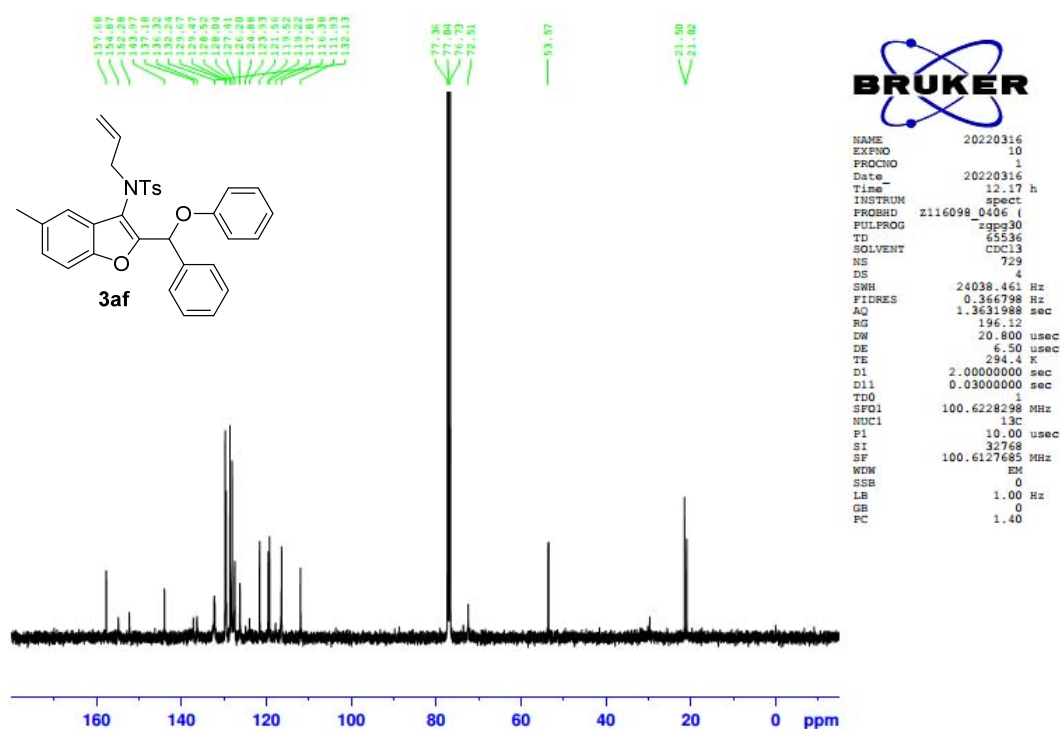

***N*-allyl-4-methyl-*N*-(6-methyl-2-(phenoxy(phenyl)methyl)benzofuran-3-yl)benzenesulfonamide (3ag):**

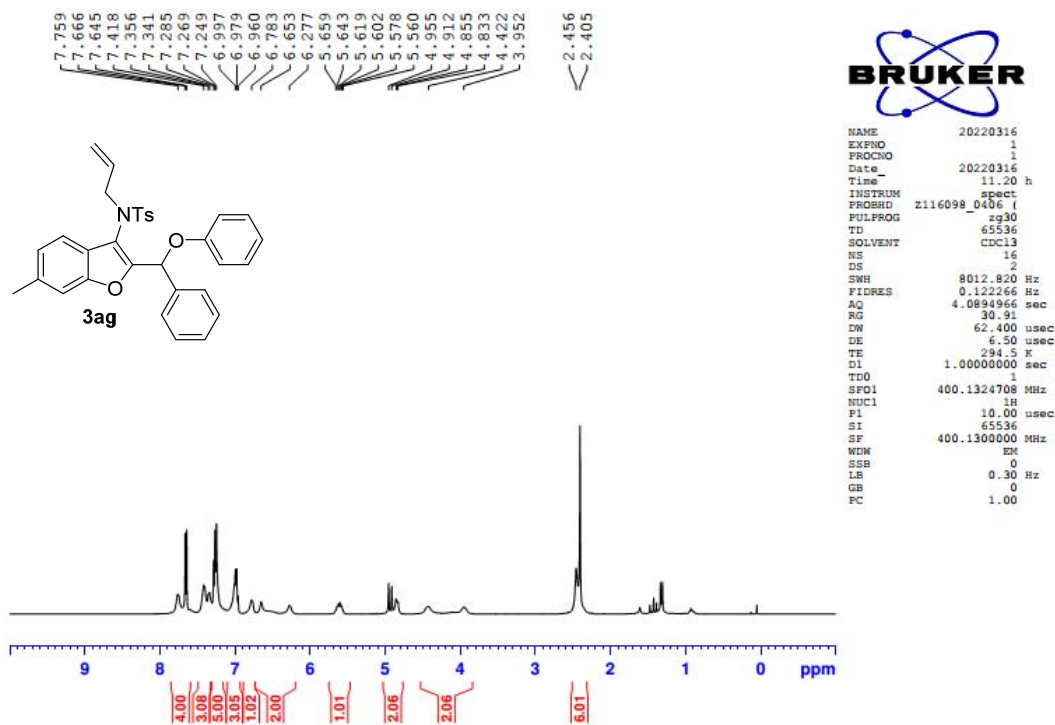

***N*-allyl-4-methyl-*N*-(6-methyl-2-(phenoxy(phenyl)methyl)benzofuran-3-yl)benzenesulfonamide (3ag):**

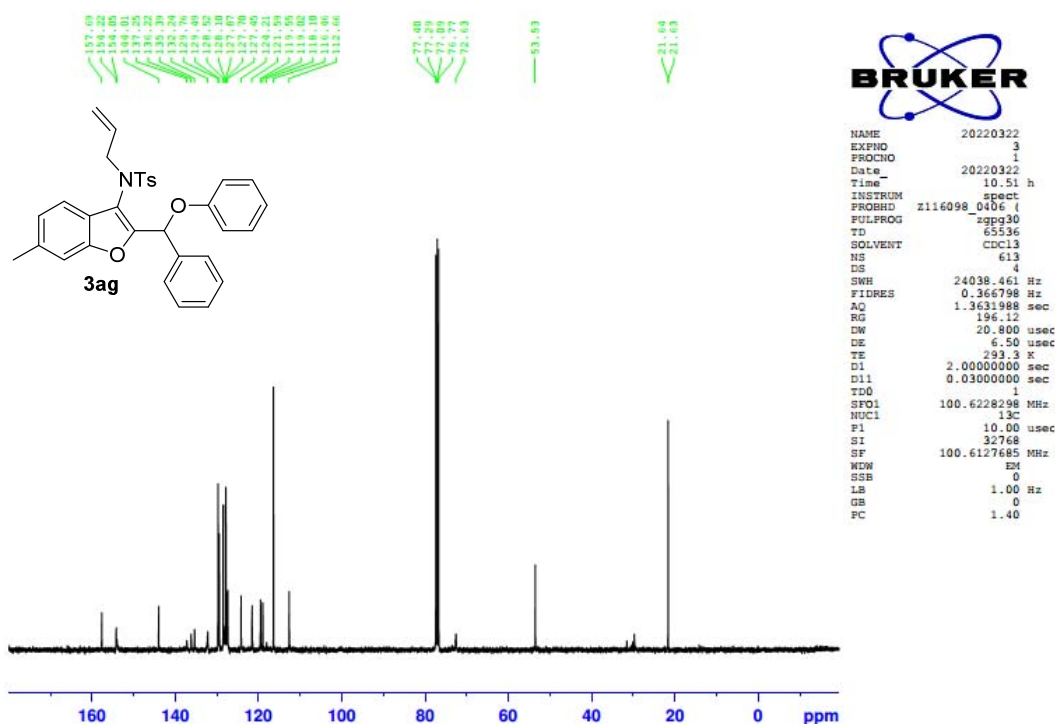

***N*-allyl-*N*-(2-((2-bromophenoxy)(phenyl)methyl)benzofuran-3-yl)-4-methylbenzenesulfonamide (3ba):**

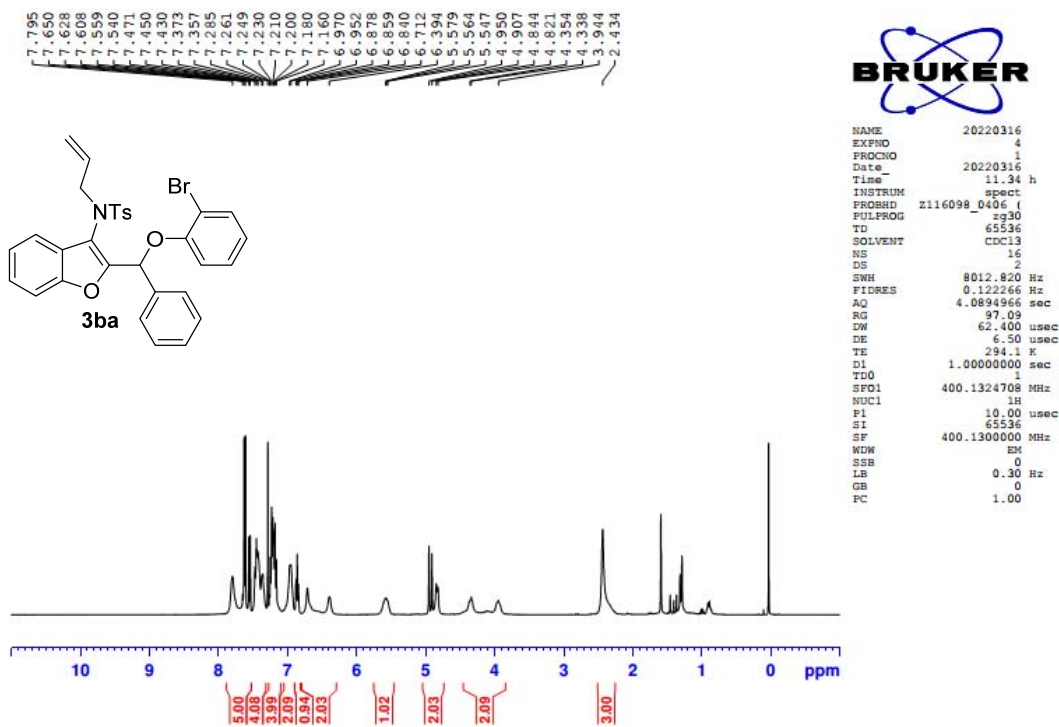

***N*-allyl-*N*-(2-((2-bromophenoxy)(phenyl)methyl)benzofuran-3-yl)-4-methylbenzenesulfonamide (3ba):**

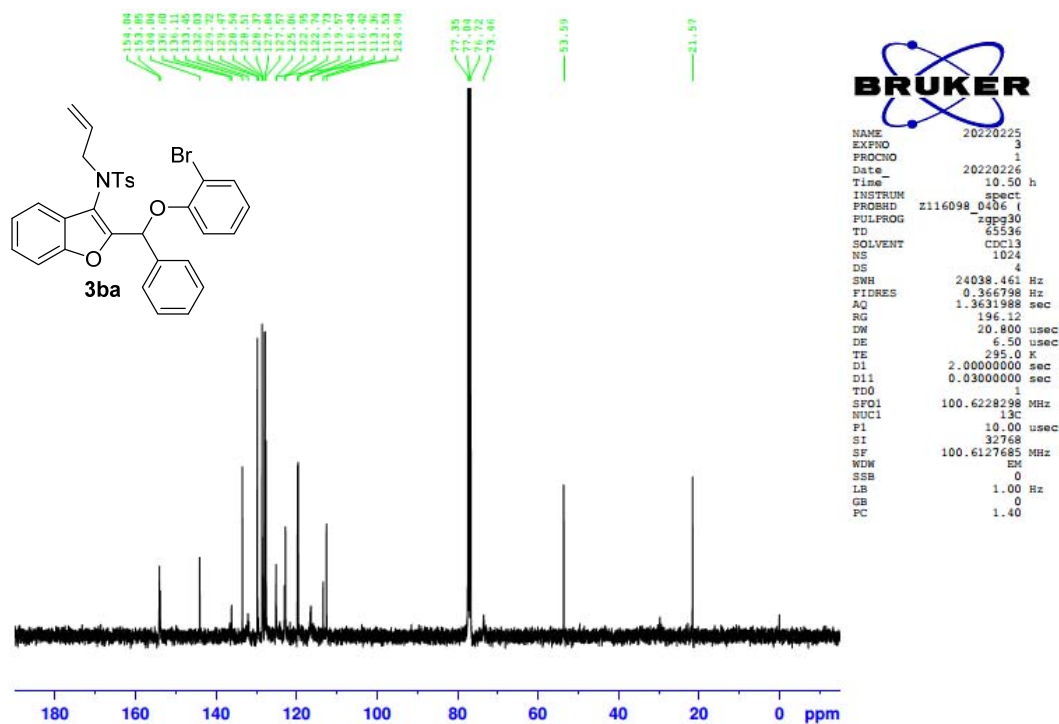

***N*-allyl-*N*-(2-((3-bromophenoxy)(phenyl)methyl)benzofuran-3-yl)-4-methylbenzenesulfonamide (3ca):**

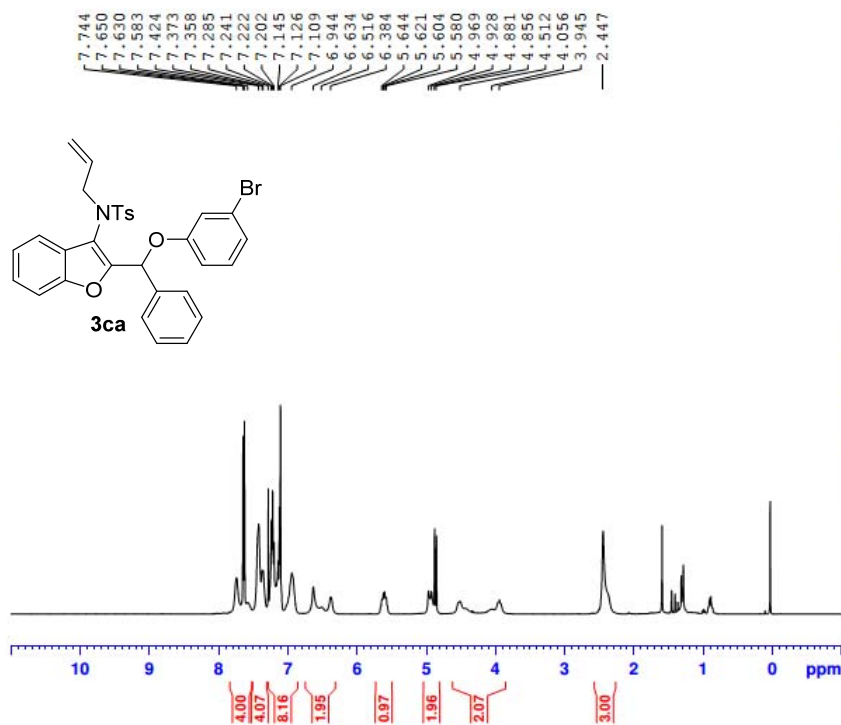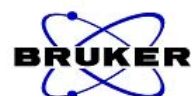

```

NAME      20220316
EXPNO     2
PROCNO    1
Date_     20220316
Time      11.25 h
INSTRUM   spect
PROBHD    zg30
PULPROG   zg30
TD         65536
SOLVENT   CDCl3
NS         16
DS         2
SWH        8012.820 Hz
FIDRES     0.122266 Hz
AQ         4.0894966 sec
RG         78.23
DW         62.400 usec
DE         6.50 usec
TE         294.3 K
D1         1.0000000 sec
TD0        1
SFO1      400.1324708 MHz
NUC1       1H
P1         10.00 usec
SI         65536
SF         400.1300000 MHz
WDW        EM
SSB        0
LB         0.30 Hz
GB         0
PC         1.00
    
```

***N*-allyl-*N*-(2-((3-bromophenoxy)(phenyl)methyl)benzofuran-3-yl)-4-methylbenzenesulfonamide (3ca):**

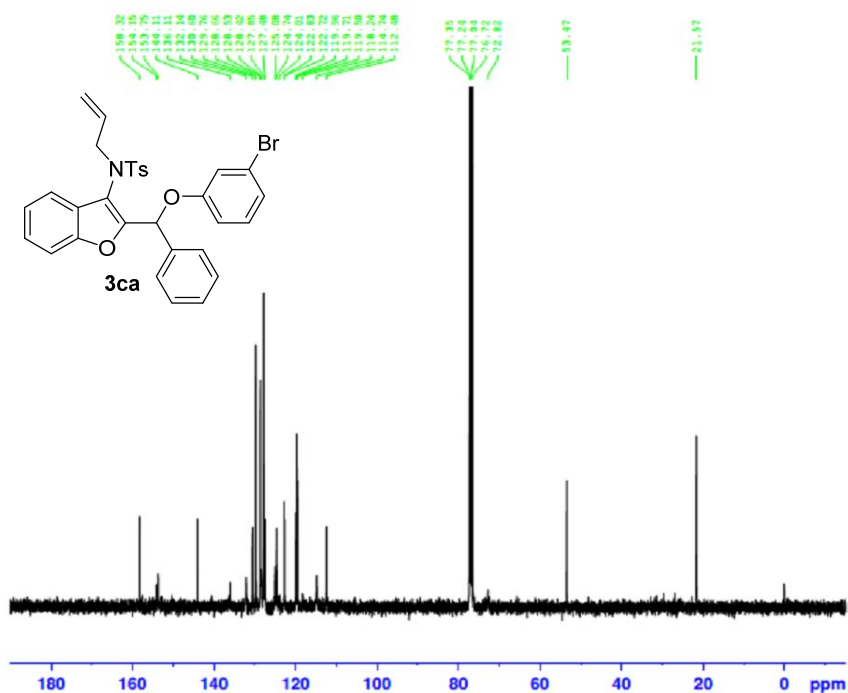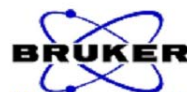

```

NAME      20220226
EXPNO     4
PROCNO    1
Date_     20220226
Time      11.54 h
INSTRUM   spect
PROBHD    zg30
PULPROG   zg30
TD         65536
SOLVENT   CDCl3
NS         16
DS         4
SWH        24028.461 Hz
FIDRES     0.3264798 Hz
AQ         1.3681928 sec
RG         196.11
DW         20.800 usec
DE         6.50 usec
TE         296.3 K
D1         2.0000000 sec
D11        0.0200000 sec
TD0        1
SFO1      100.6218298 MHz
NUC1       13C
P1         10.00 usec
SI         22768
SF         100.6117688 MHz
WDW        EM
SSB        0
LB         1.00 Hz
GB         0
PC         1.40
    
```



***N*-allyl-*N*-(2-((4-bromophenoxy)(phenyl)methyl)benzofuran-3-yl)-4-methylbenzenesulfonamide (3da):**

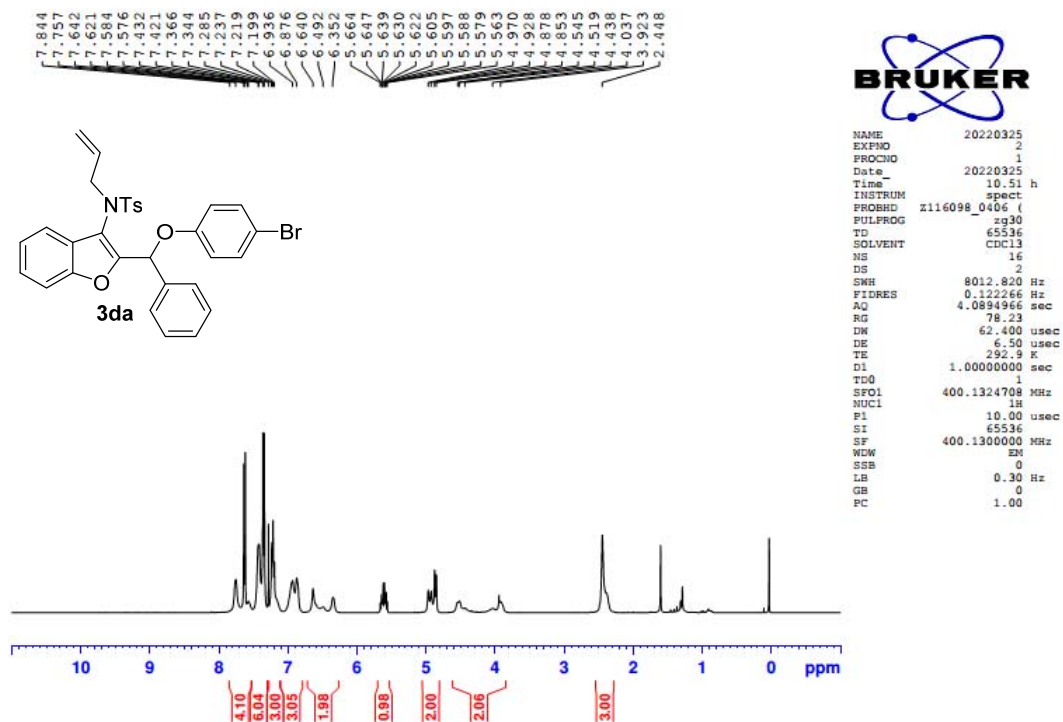

***N*-allyl-*N*-(2-((4-bromophenoxy)(phenyl)methyl)benzofuran-3-yl)-4-methylbenzenesulfonamide (3da):**

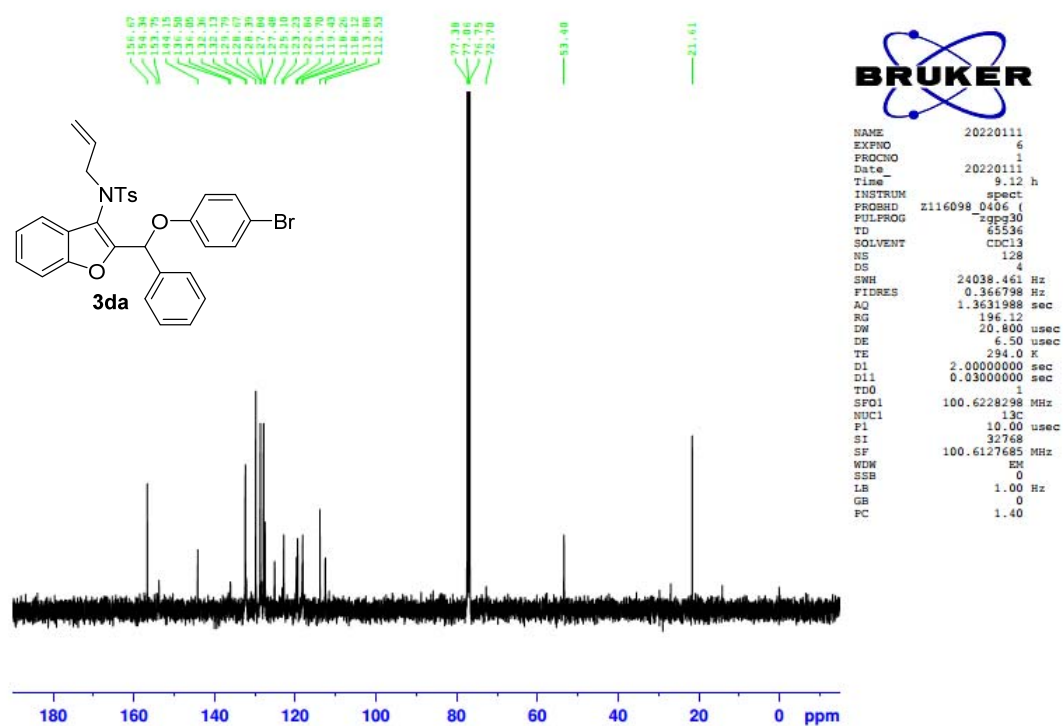

***N*-allyl-*N*-(2-((4-chlorophenoxy)(phenyl)methyl)benzofuran-3-yl)-4-methylbenzenesulfonamide (3ea):**

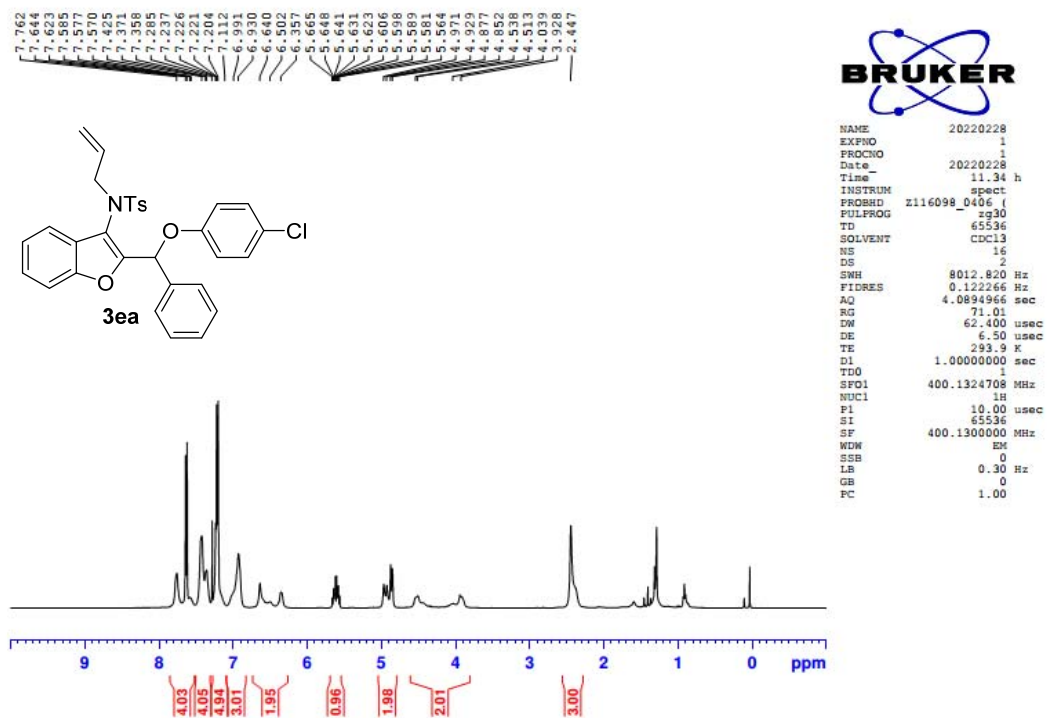

***N*-allyl-*N*-(2-((4-chlorophenoxy)(phenyl)methyl)benzofuran-3-yl)-4-methylbenzenesulfonamide (3ea):**

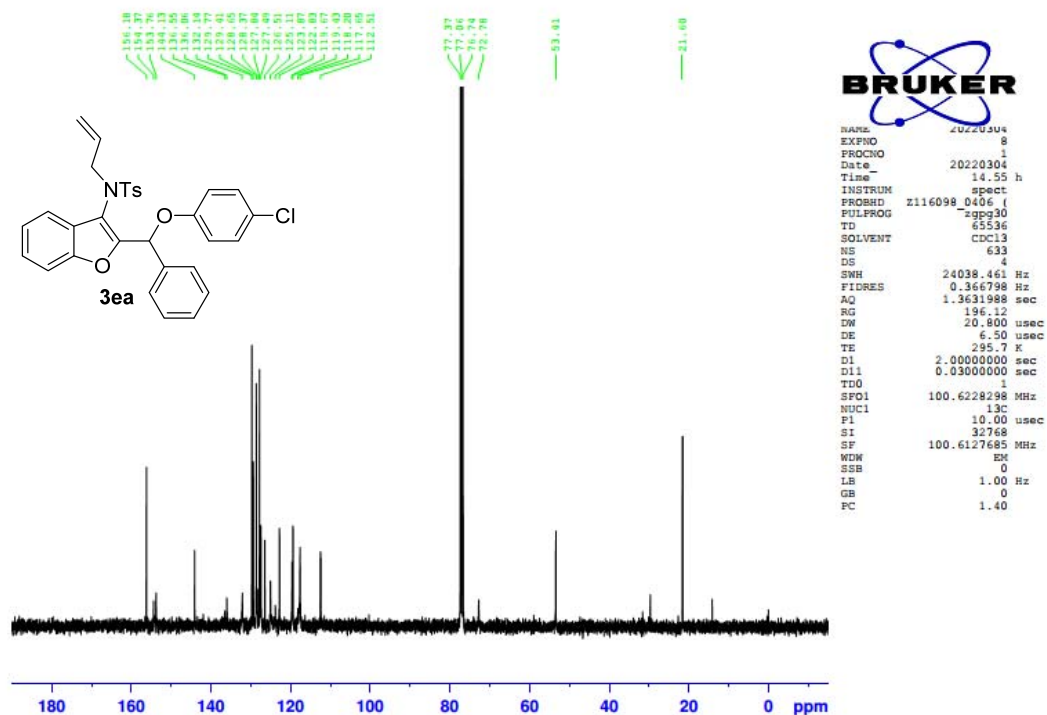



***N*-allyl-4-methyl-*N*-(2-(phenyl(*p*-tolylloxy)methyl)benzofuran-3-yl)benzenesulfonamide (3fa):**

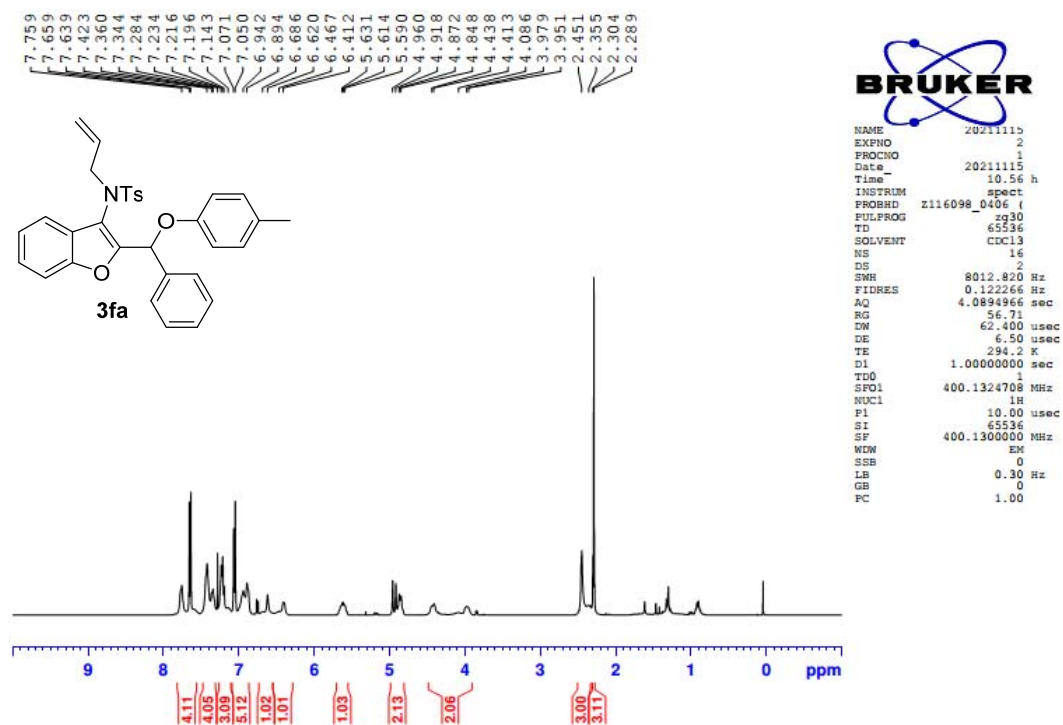

***N*-allyl-4-methyl-*N*-(2-(phenyl(*p*-tolylloxy)methyl)benzofuran-3-yl)benzenesulfonamide (3fa):**

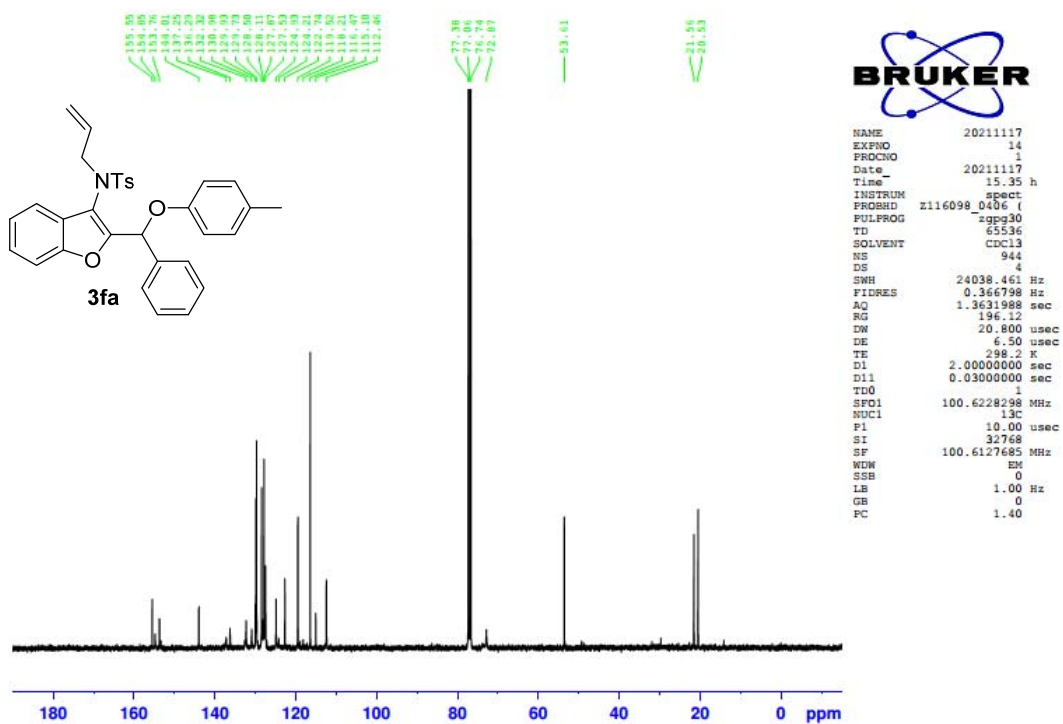

***N*-allyl-*N*-(2-((4-methoxyphenoxy)(phenyl)methyl)benzofuran-3-yl)-4-methylbenzenesulfonamide (3ga):**

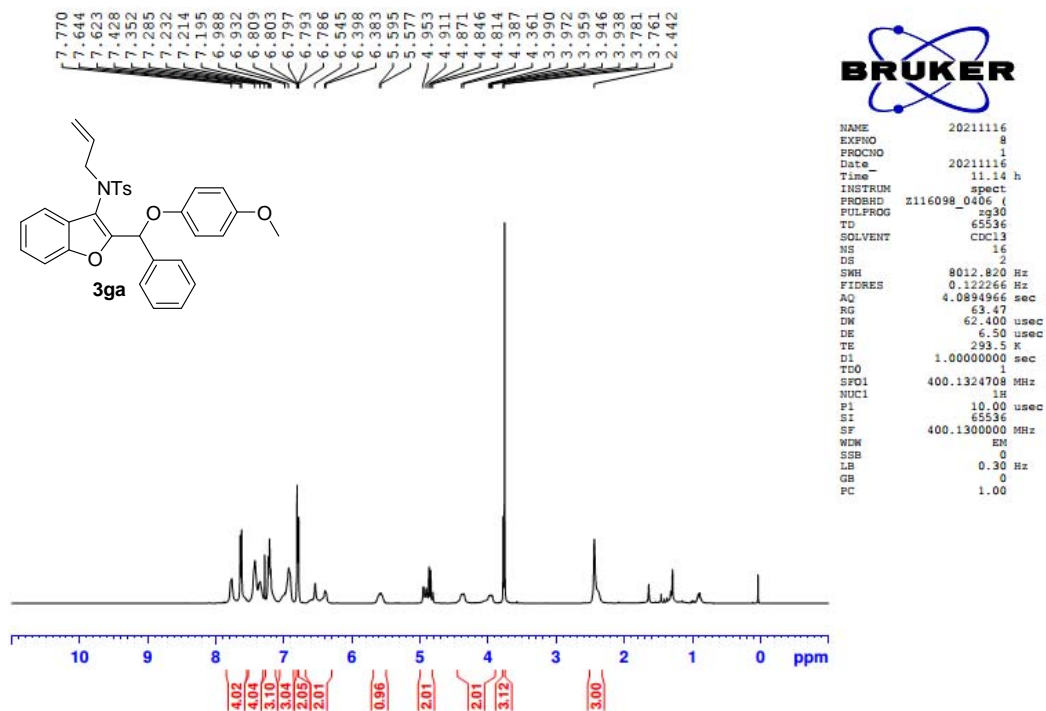

***N*-allyl-*N*-(2-((4-methoxyphenoxy)(phenyl)methyl)benzofuran-3-yl)-4-methylbenzenesulfonamide (3ga):**

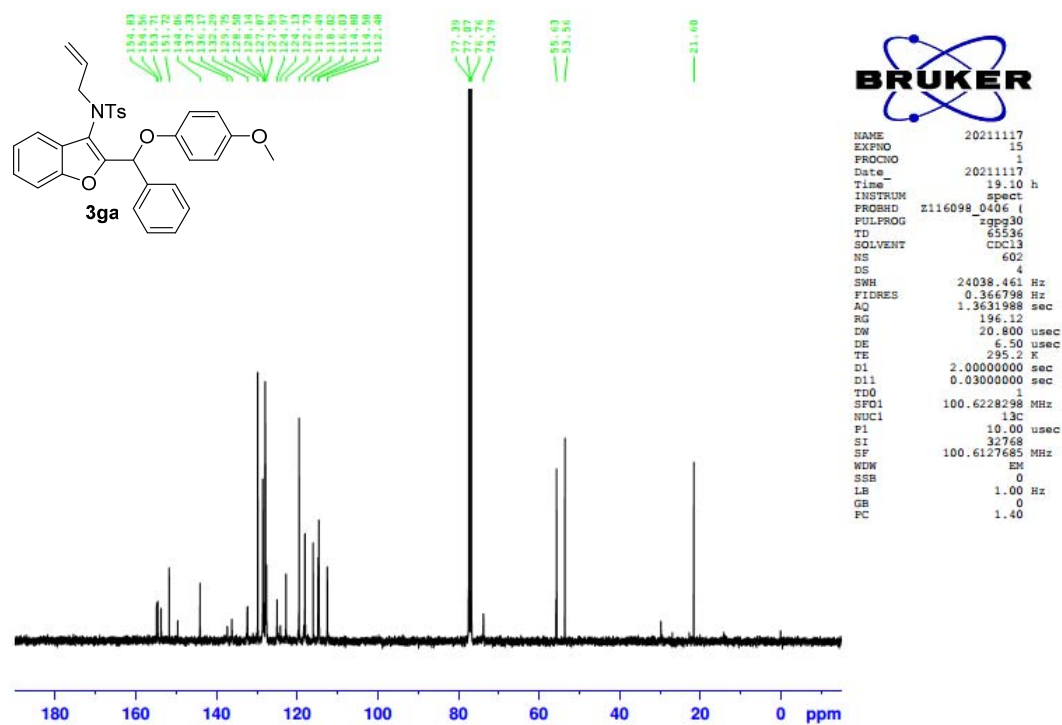

***N*-allyl-*N*-(2-((3,5-dimethylphenoxy)(phenyl)methyl)benzofuran-3-yl)-4-methylbenzenesulfonamide (3ha):**

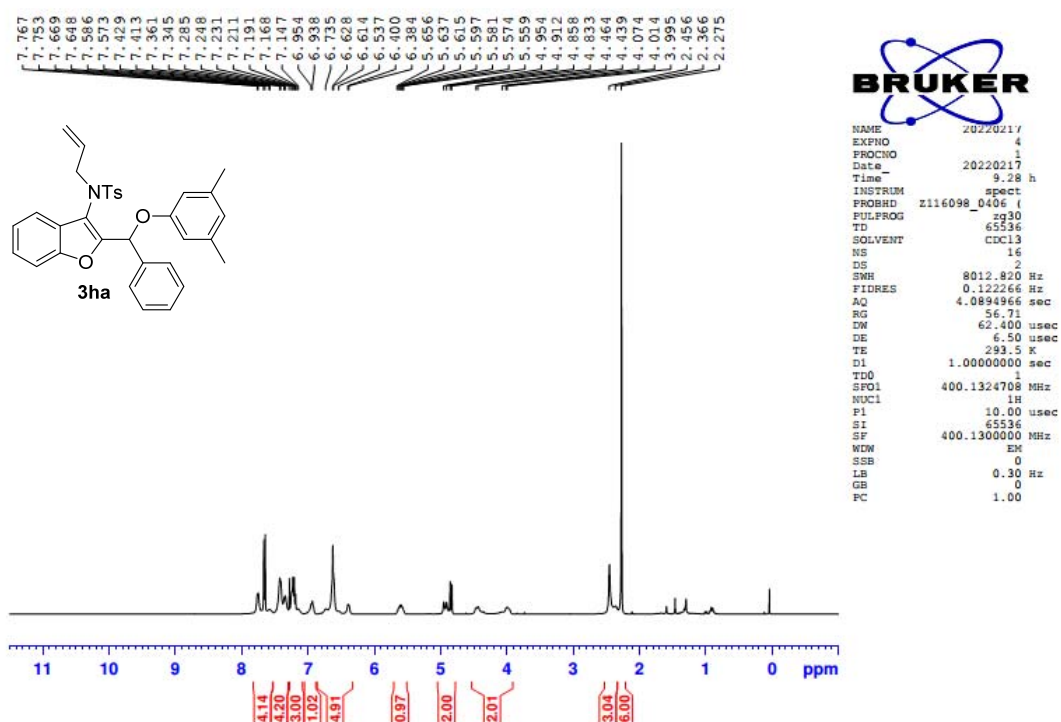

***N*-allyl-*N*-(2-((3,5-dimethylphenoxy)(phenyl)methyl)benzofuran-3-yl)-4-methylbenzenesulfonamide (3ha):**

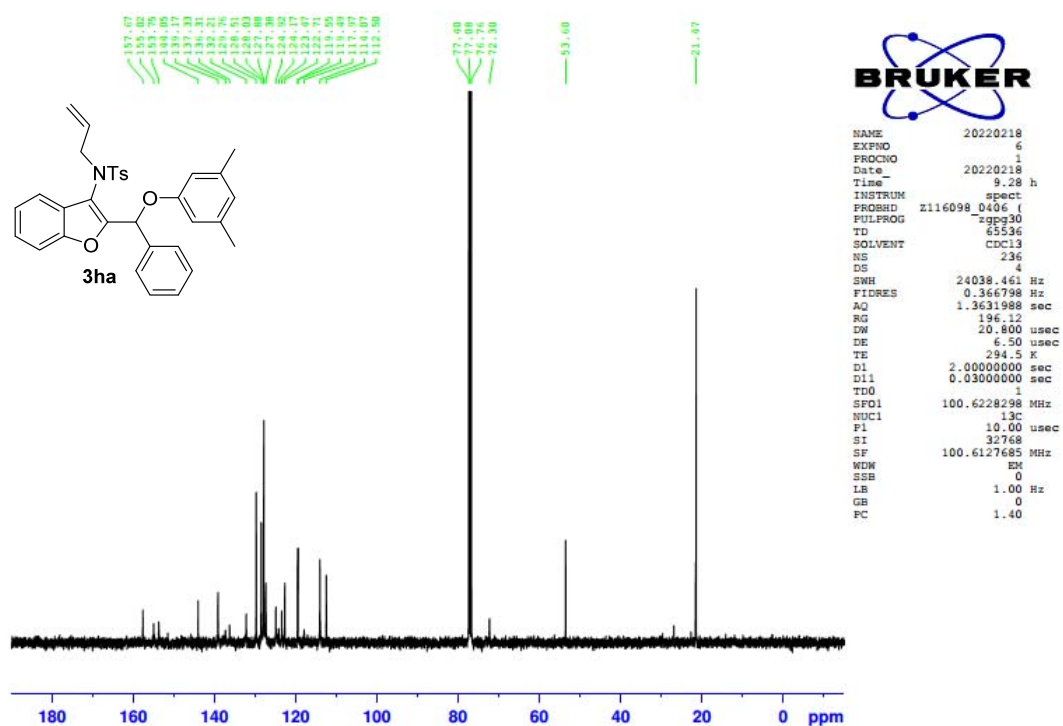

**(E)-N-(hex-2-en-1-yl)-4-methyl-N-(2-(phenoxy(phenyl)methyl)benzofuran-3-yl)benzenesulfonamide (3ia):**

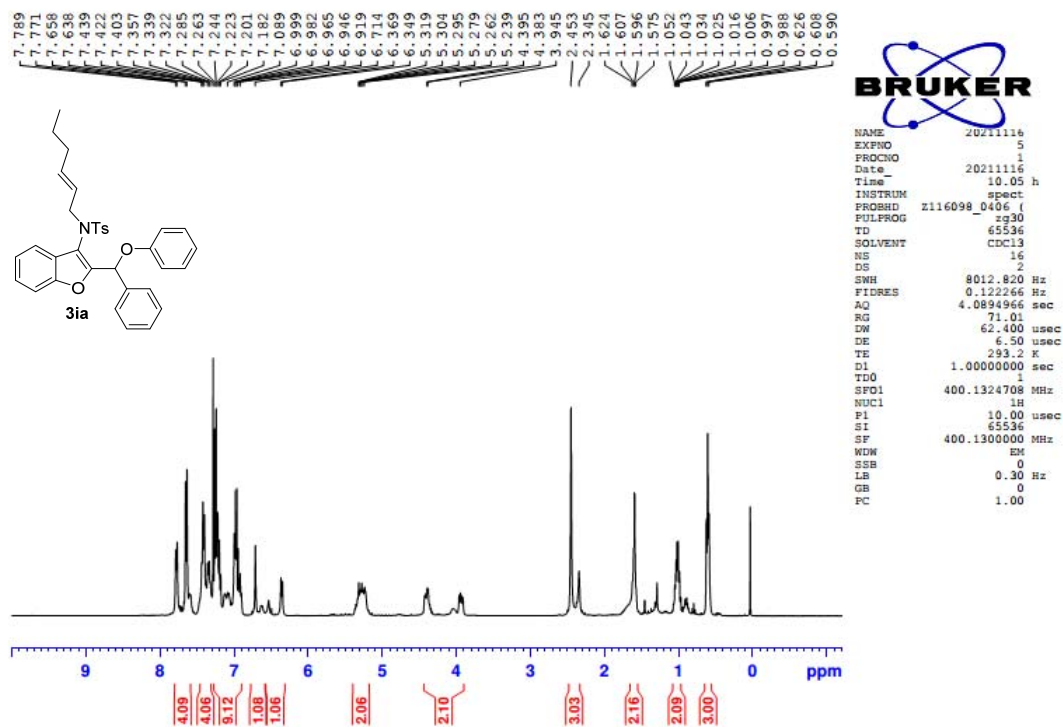

**(E)-N-(hex-2-en-1-yl)-4-methyl-N-(2-(phenoxy(phenyl)methyl)benzofuran-3-yl)benzenesulfonamide (3ia):**

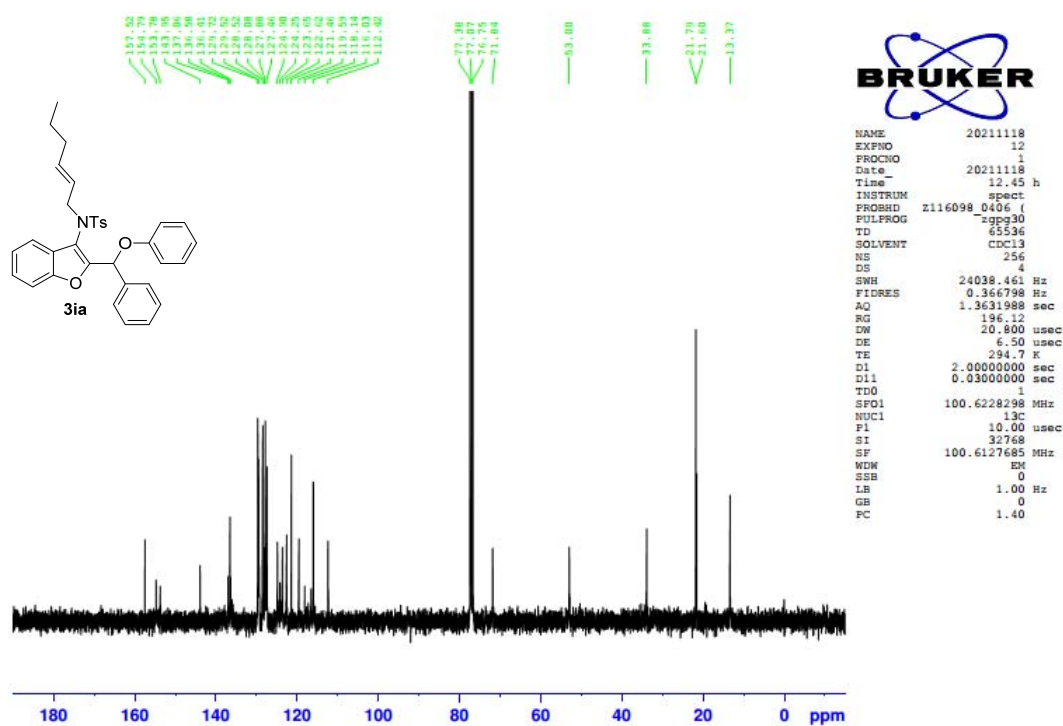

**4-methyl-N-(2-methylallyl)-N-(2-(phenoxy(phenyl)methyl)benzofuran-3-yl)benzenesulfonamide (3ja):**

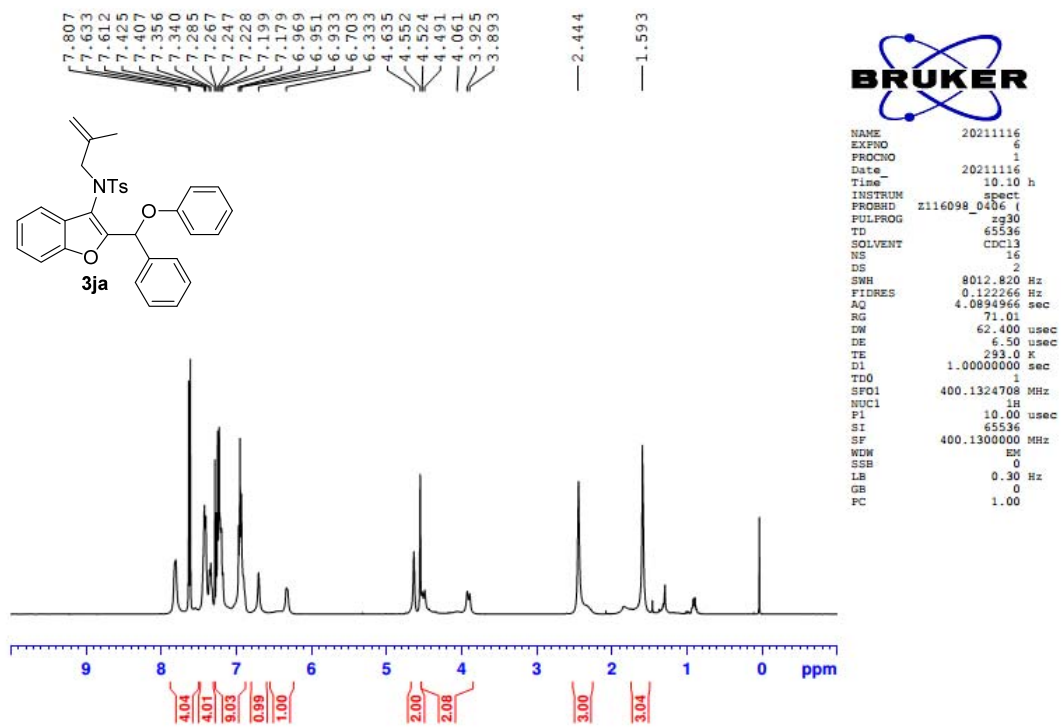

**4-methyl-N-(2-methylallyl)-N-(2-(phenoxy(phenyl)methyl)benzofuran-3-yl)benzenesulfonamide (3ja):**

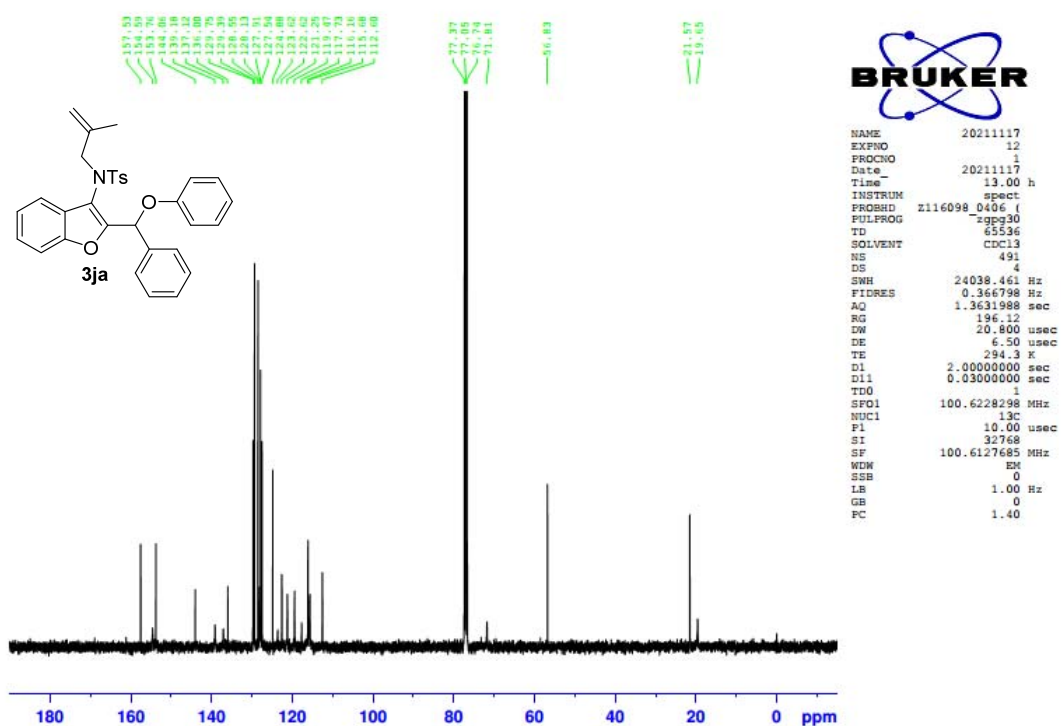



**(E)-4-methyl-N-(penta-2,4-dien-1-yl)-N-(2-(phenoxy(phenyl)methyl)benzofuran-3-yl)benzene sulfonamide (3ka):**

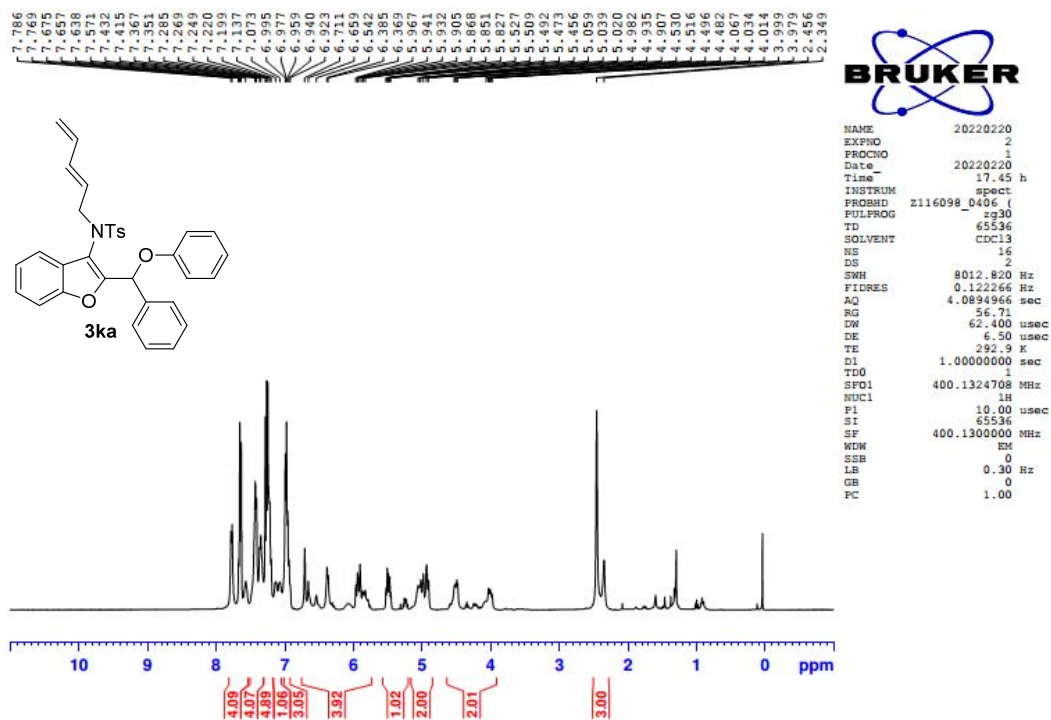

**(E)-4-methyl-N-(penta-2,4-dien-1-yl)-N-(2-(phenoxy(phenyl)methyl)benzofuran-3-yl)benzene sulfonamide (3ka):**

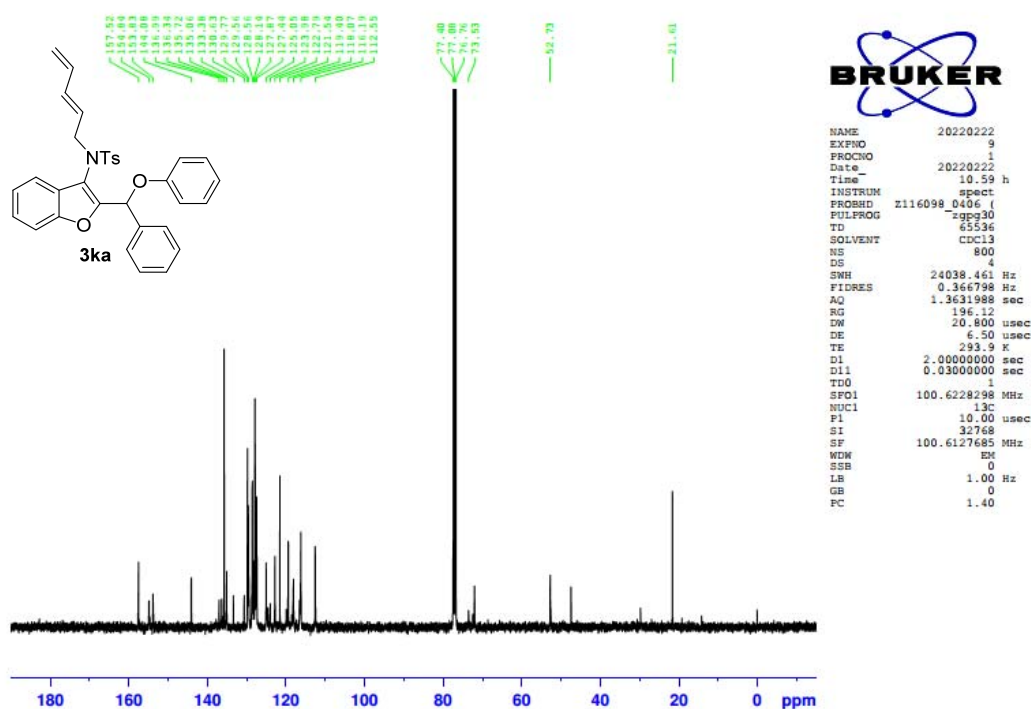

***N*-allyl-*N*-(2-((4-bromophenoxy)(2-chlorophenyl)methyl)benzofuran-3-yl)-4-methylbenzenesulfonamide (3db):**

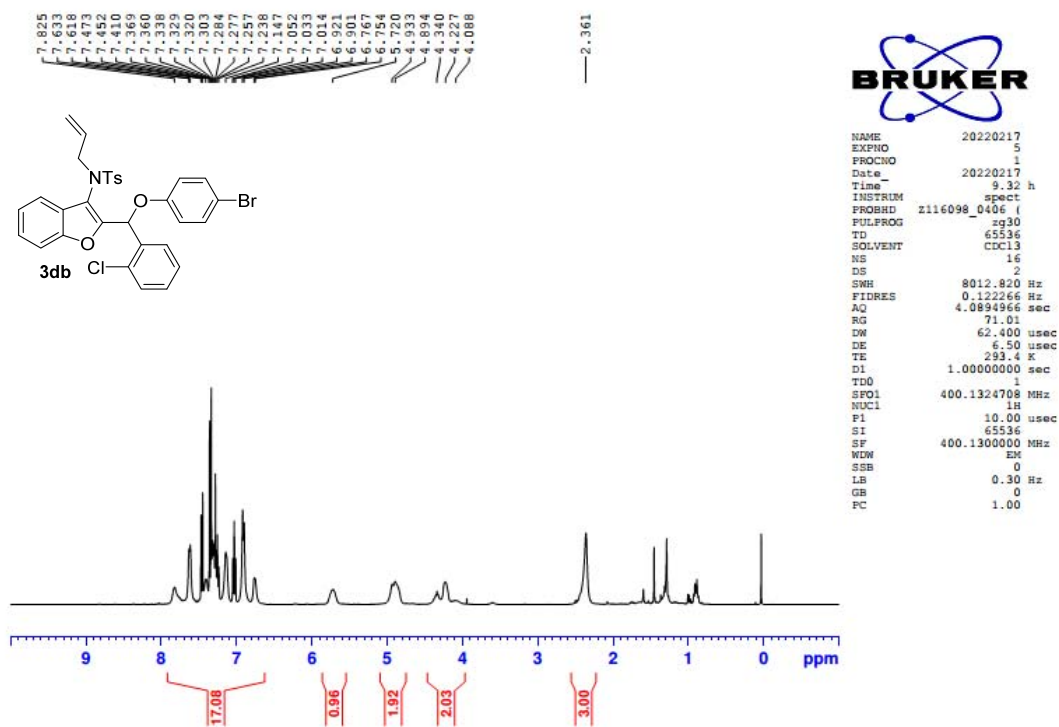

***N*-allyl-*N*-(2-((4-bromophenoxy)(2-chlorophenyl)methyl)benzofuran-3-yl)-4-methylbenzenesulfonamide (3db):**

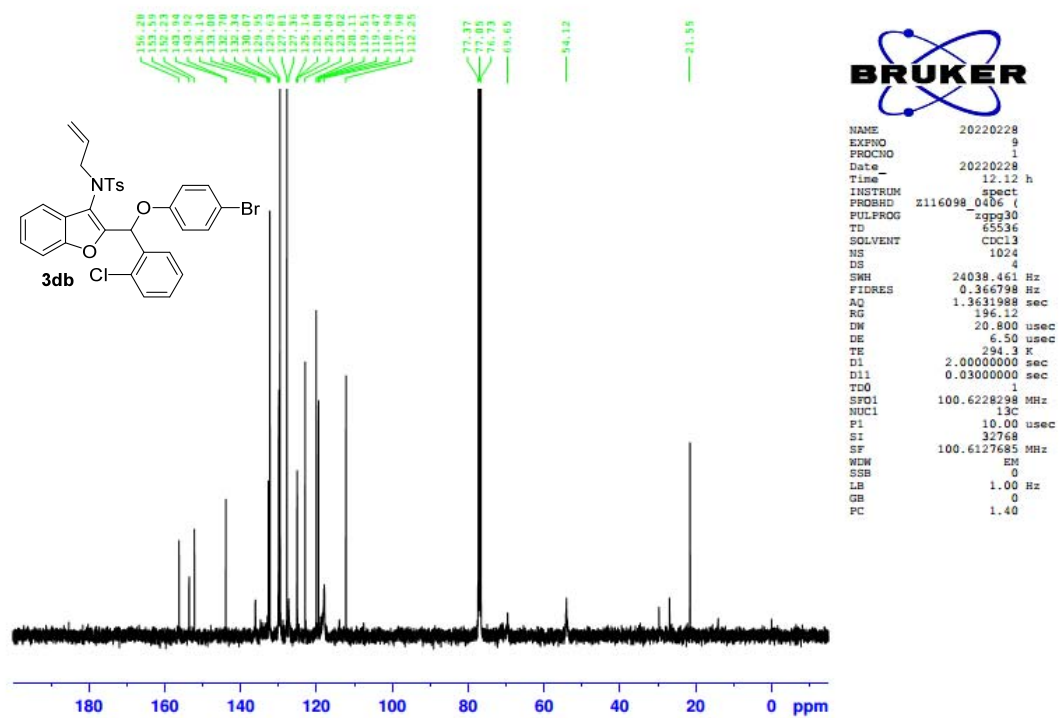

***N*-allyl-*N*-(2-((4-bromophenoxy)(*m*-tolyl)methyl)benzofuran-3-yl)-4-methylbenzenesulfonamide (3dc):**

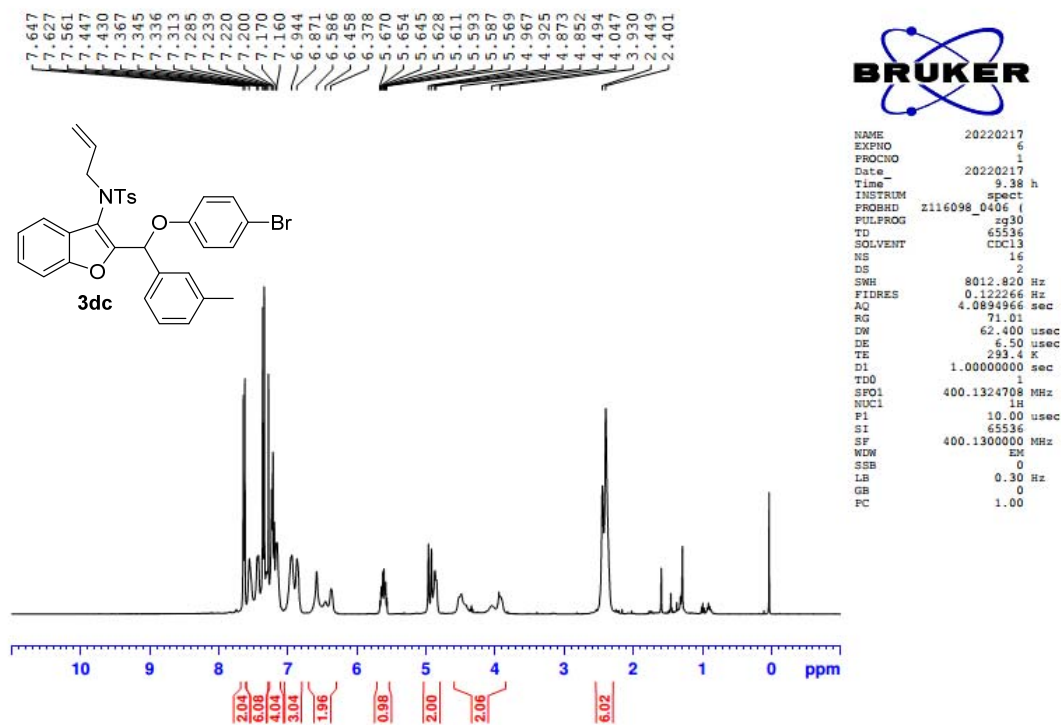

***N*-allyl-*N*-(2-((4-bromophenoxy)(*m*-tolyl)methyl)benzofuran-3-yl)-4-methylbenzenesulfonamide (3dc):**

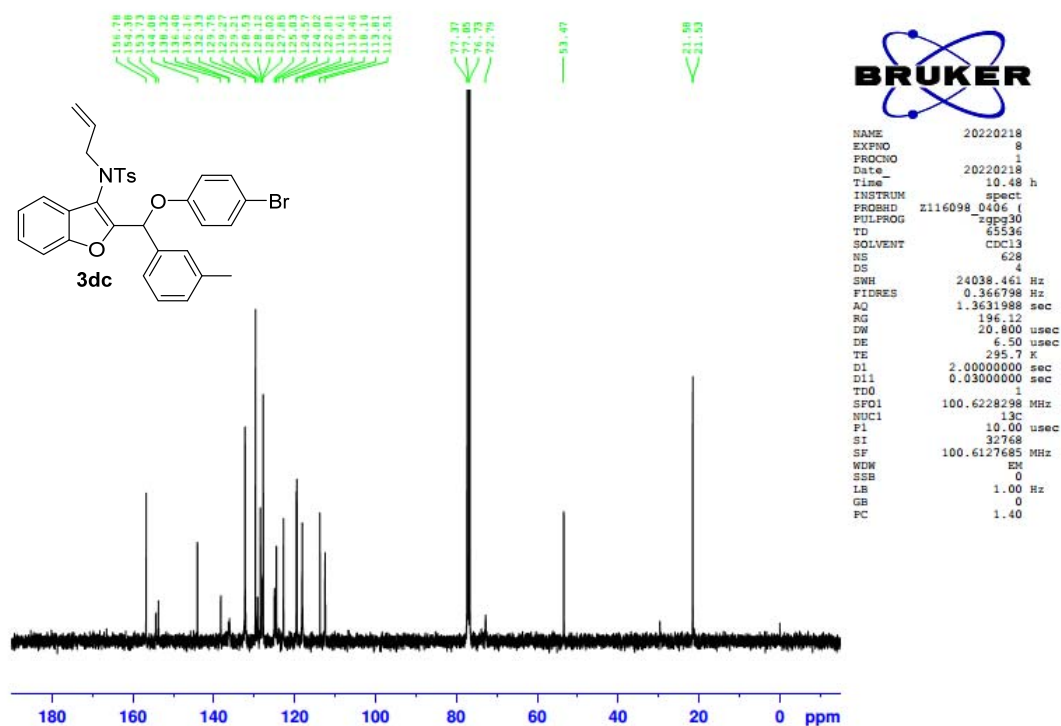





***N*-allyl-*N*-(2-((2-chlorophenyl)(*p*-tolylloxy)methyl)benzofuran-3-yl)-4-methylbenzenesulfonamide (3fb):**

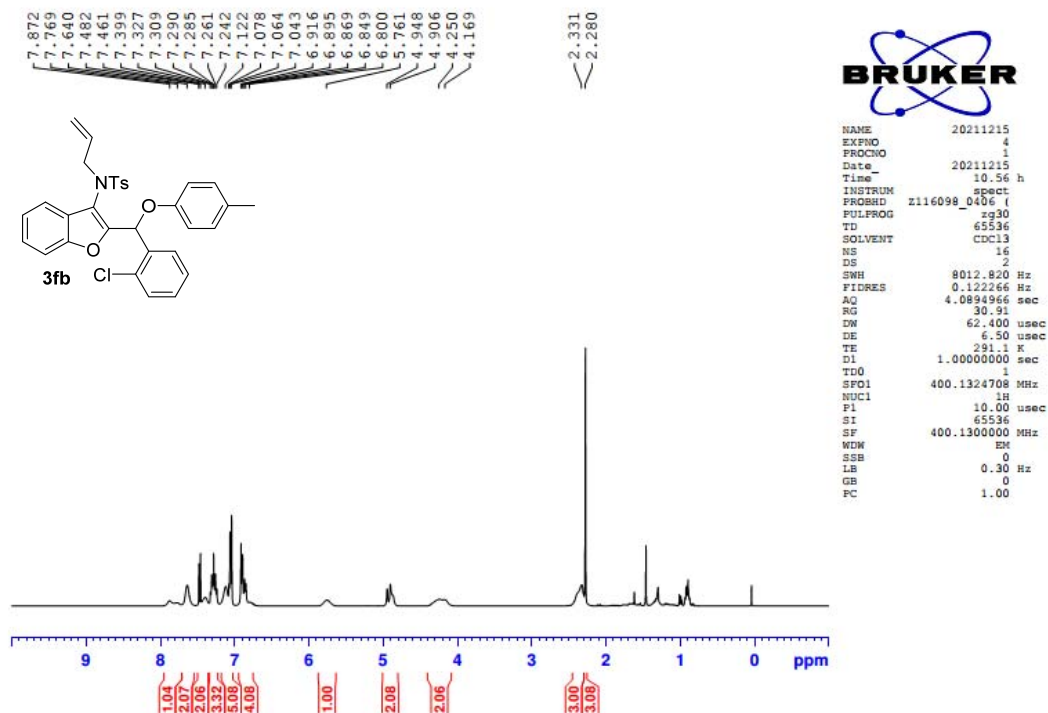

***N*-allyl-*N*-(2-((2-chlorophenyl)(*p*-tolylloxy)methyl)benzofuran-3-yl)-4-methylbenzenesulfonamide (3fb):**

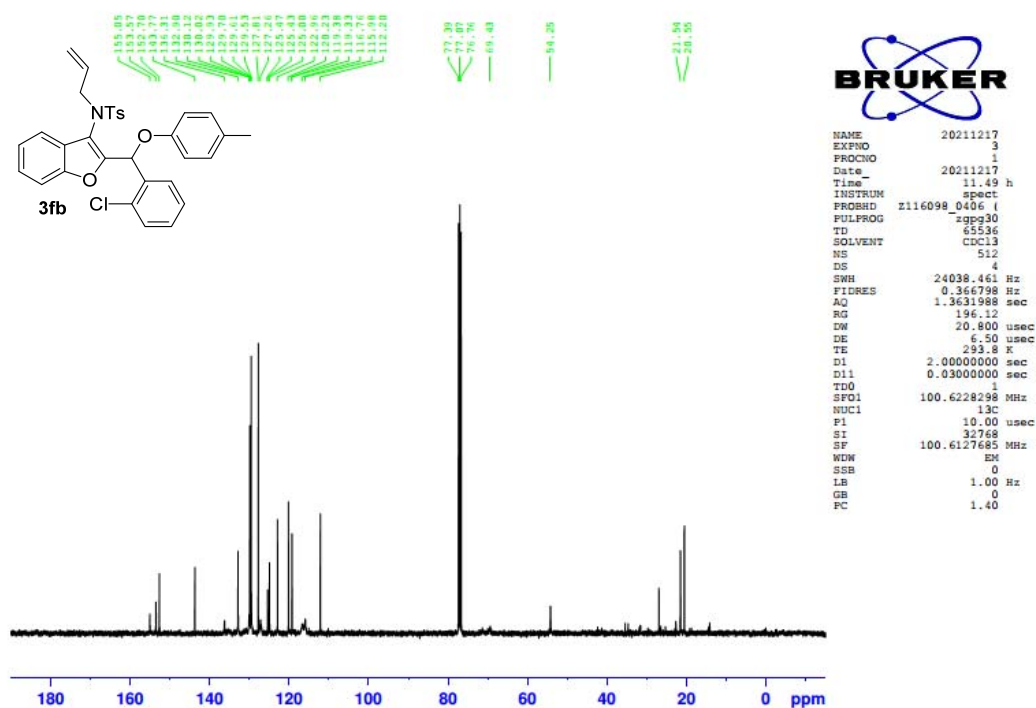

***N*-allyl-4-methyl-*N*-(2-(*m*-tolyl(*p*-tolylloxy)methyl)benzofuran-3-yl)benzenesulfonamide (3fc):**

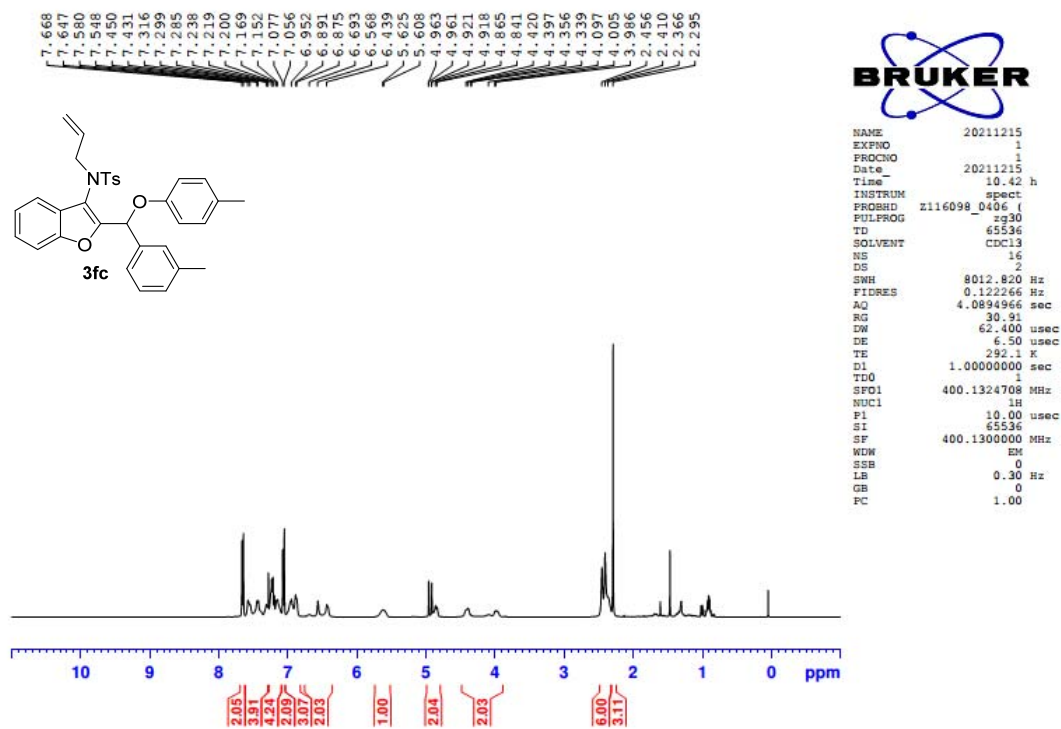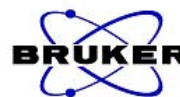

```

NAME      20211215
EXPNO     1
PROCNO    1
Date_     20211215
Time      10.42 h
INSTRUM   spect
PROBHD    z116098_0406 (
PULPROG   zg30
TD         65536
SOLVENT   CDCl3
NS         16
DS         2
SWH        8012.820 Hz
FIDRES     0.122266 Hz
AQ         4.0894966 sec
RG         30.91
DW         62.400 usec
DE         6.50 usec
TE         292.1 K
D1         1.00000000 sec
TDO        1
SFO1       400.1324708 MHz
NUC1       1H
P1         10.00 usec
SI         65536
SF         400.1300000 MHz
WDW        EM
SSB        0
LB         0.30 Hz
GB         0
PC         1.00
    
```

***N*-allyl-4-methyl-*N*-(2-(*m*-tolyl(*p*-tolylloxy)methyl)benzofuran-3-yl)benzenesulfonamide (3fc):**

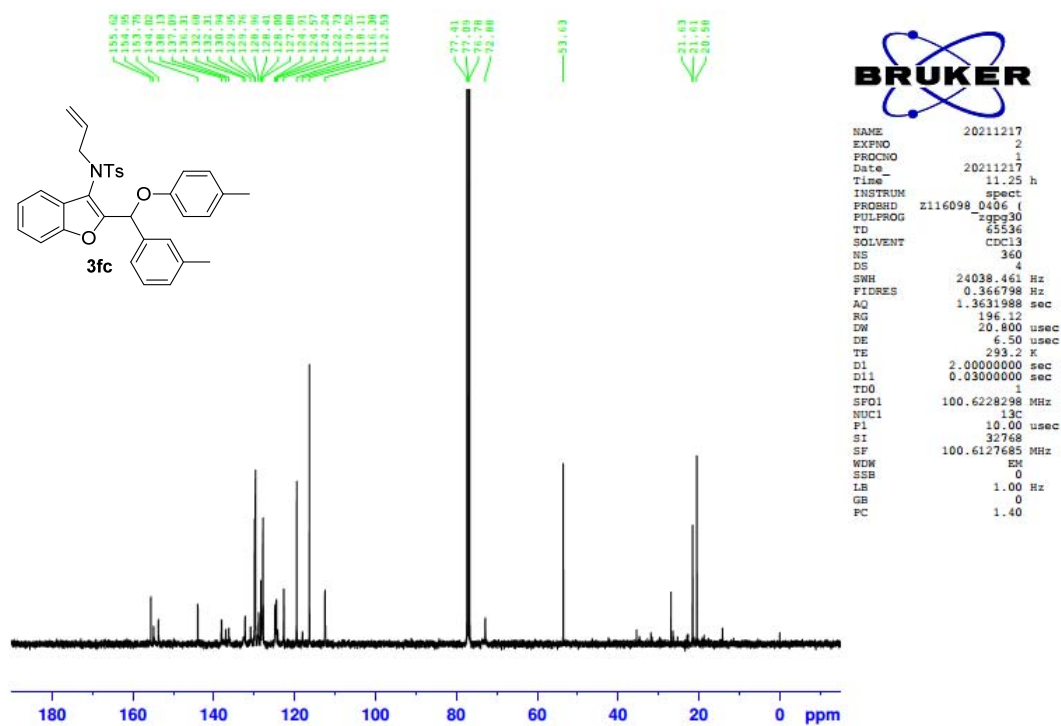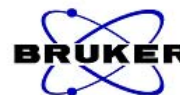

```

NAME      20211217
EXPNO     2
PROCNO    1
Date_     20211217
Time      11.25 h
INSTRUM   spect
PROBHD    z116098_0406 (
PULPROG   zgpg30
TD         65536
SOLVENT   cdcl3
NS         360
DS         4
SWH        24038.461 Hz
FIDRES     0.366798 Hz
AQ         1.3631988 sec
RG         196.12
DW         20.800 usec
DE         6.50 usec
TE         293.2 K
D1         2.00000000 sec
D11        0.03000000 sec
TDO        1
SFO1       100.6228298 MHz
NUC1       13C
P1         10.00 usec
SI         32768
SF         100.6127685 MHz
WDW        EM
SSB        0
LB         1.00 Hz
GB         0
PC         1.40
    
```

***N*-allyl-*N*-(2-((3-methoxyphenyl)(*p*-tolylloxy)methyl)benzofuran-3-yl)-4-methylbenzenesulfonamide (3fd):**

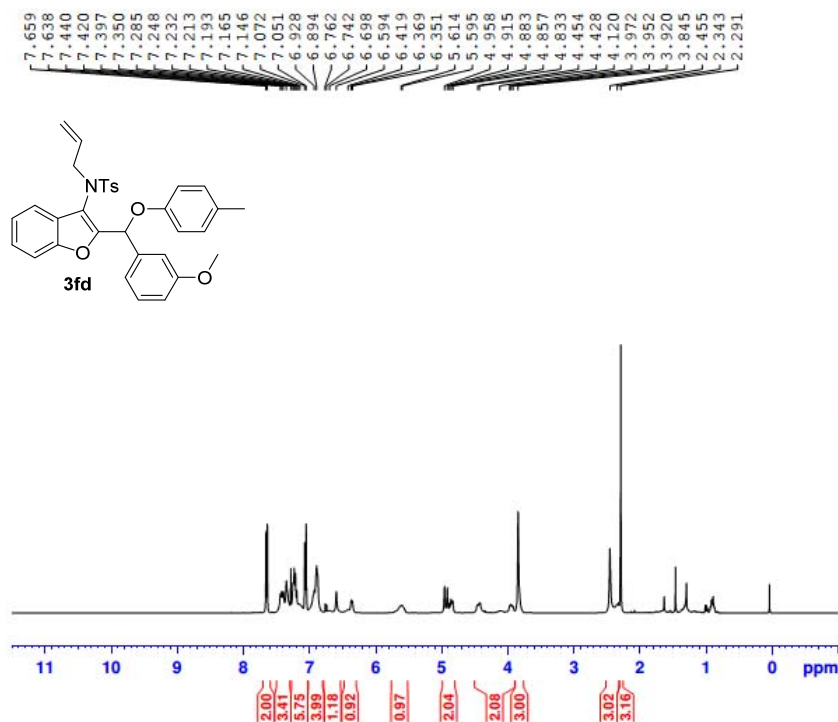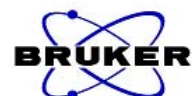

```

NAME      20211215
EXPNO    2
PROCNO    1
Date_     20211215
Time      10.46 h
INSTRUM   spect
PROBHD    Z116098_0406 (
PULPROG   zg30
TD         65536
SOLVENT   CDCl3
NS         16
DS         2
SWH        8012.820 Hz
FIDRES     0.122266 Hz
AQ         4.0894966 sec
RG         30.91
DW         62.400 usec
DE         6.50 usec
TE         291.3 K
D1         1.00000000 sec
TD0        1
SFO1       400.1324708 MHz
NUC1       1H
P1         10.00 usec
SI         65536
SF         400.1300000 MHz
WDW        EM
SSB        0
LB         0.30 Hz
GB         0
PC         1.00
    
```

***N*-allyl-*N*-(2-((3-methoxyphenyl)(*p*-tolylloxy)methyl)benzofuran-3-yl)-4-methylbenzenesulfonamide (3fd):**

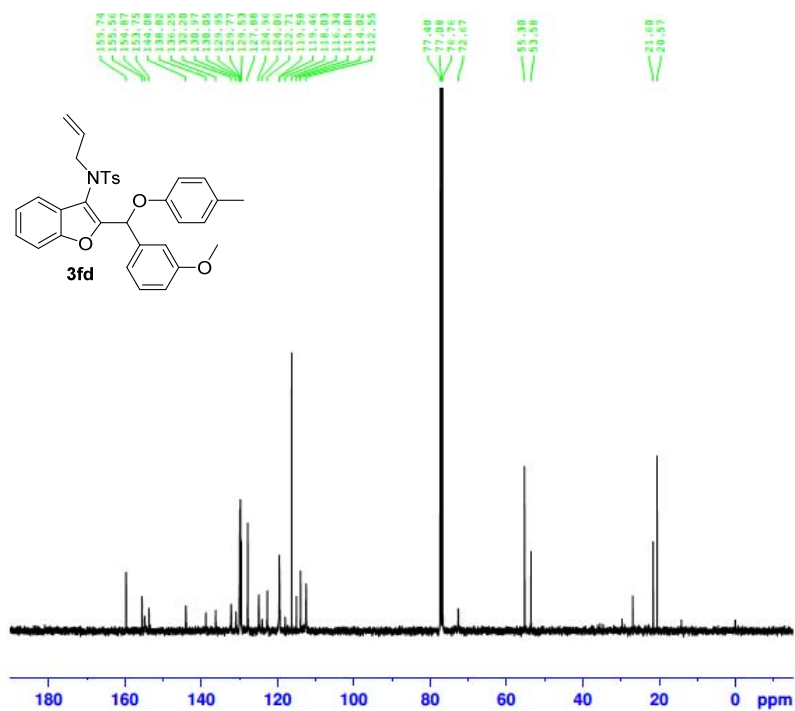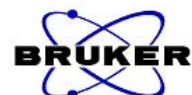

```

NAME      20211217
EXPNO    1
PROCNO    1
Date_     20211217
Time      11.02 h
INSTRUM   spect
PROBHD    Z116098_0406 (
PULPROG   zgpg30
TD         65536
SOLVENT   cdcl3
NS         346
DS         4
SWH        24038.461 Hz
FIDRES     0.366798 Hz
AQ         1.3631988 sec
RG         196.12
DW         20.800 usec
DE         6.50 usec
TE         293.3 K
D1         2.00000000 sec
D11        0.03000000 sec
TD0        1
SFO1       100.6228298 MHz
NUC1       13C
P1         10.00 usec
SI         32768
SF         100.6127685 MHz
WDW        EM
SSB        0
LB         1.00 Hz
GB         0
PC         1.40
    
```

***N*-allyl-*N*-(2-((2-chlorophenyl)(3,5-dimethylphenoxy)methyl)benzofuran-3-yl)-4-methylbenzene sulfonamide (3hb):**

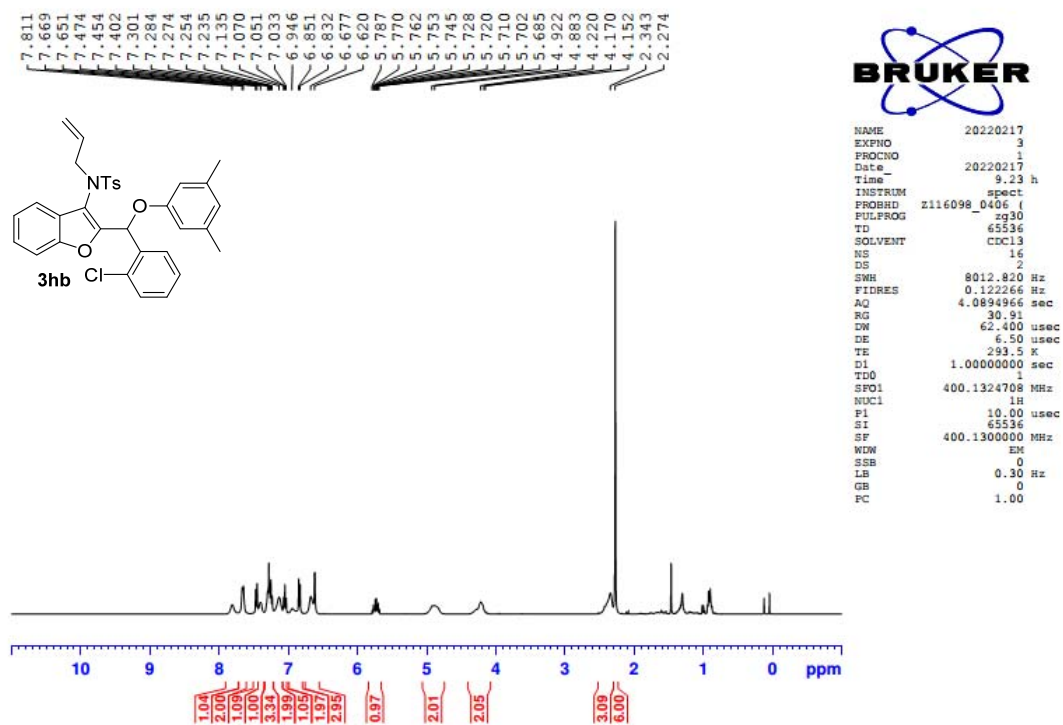

***N*-allyl-*N*-(2-((2-chlorophenyl)(3,5-dimethylphenoxy)methyl)benzofuran-3-yl)-4-methylbenzene sulfonamide (3hb):**

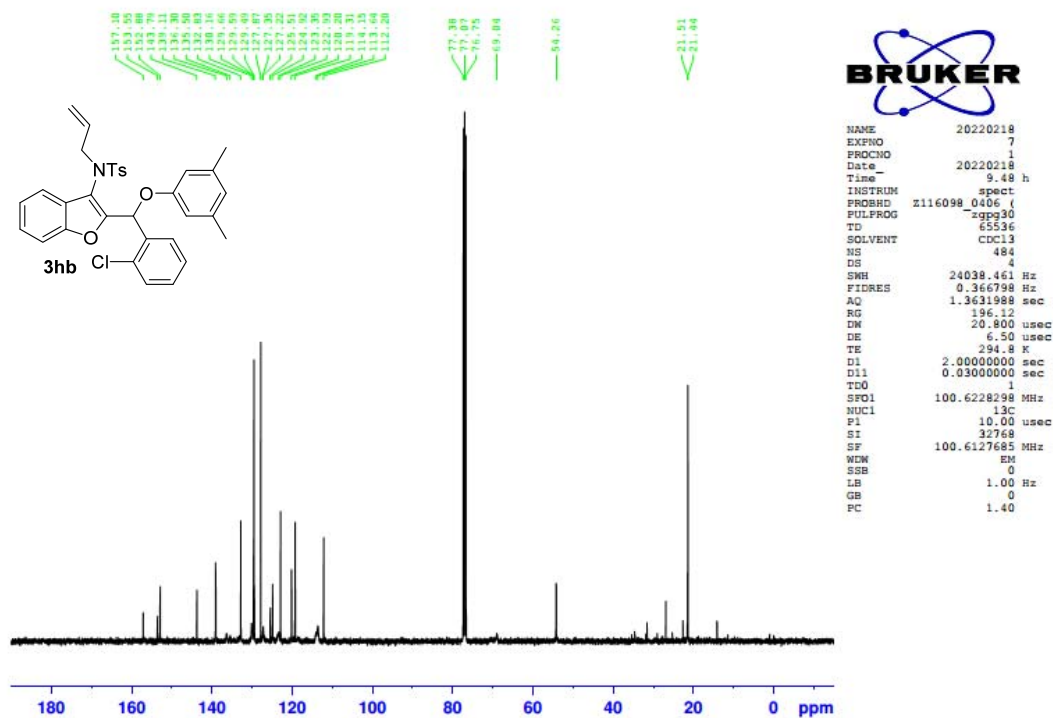

***N*-allyl-*N*-(2-((3,5-dimethylphenoxy)(*m*-tolyl)methyl)benzofuran-3-yl)-4-methylbenzenesulfonamide (3hc):**

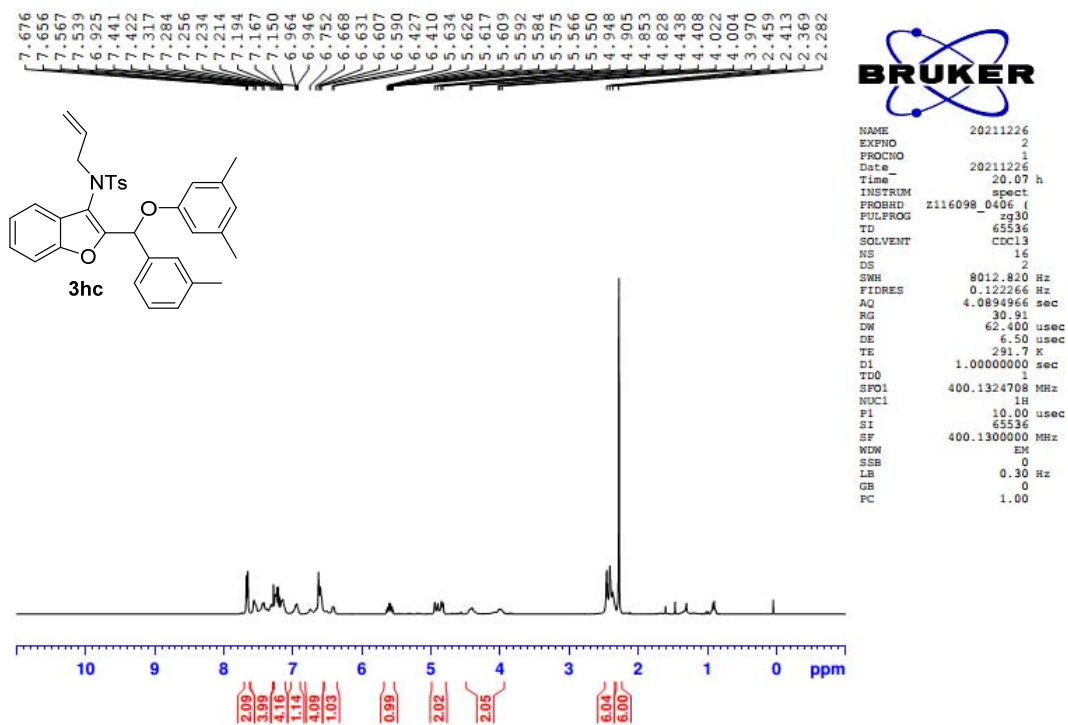

***N*-allyl-*N*-(2-((3,5-dimethylphenoxy)(*m*-tolyl)methyl)benzofuran-3-yl)-4-methylbenzenesulfonamide (3hc):**

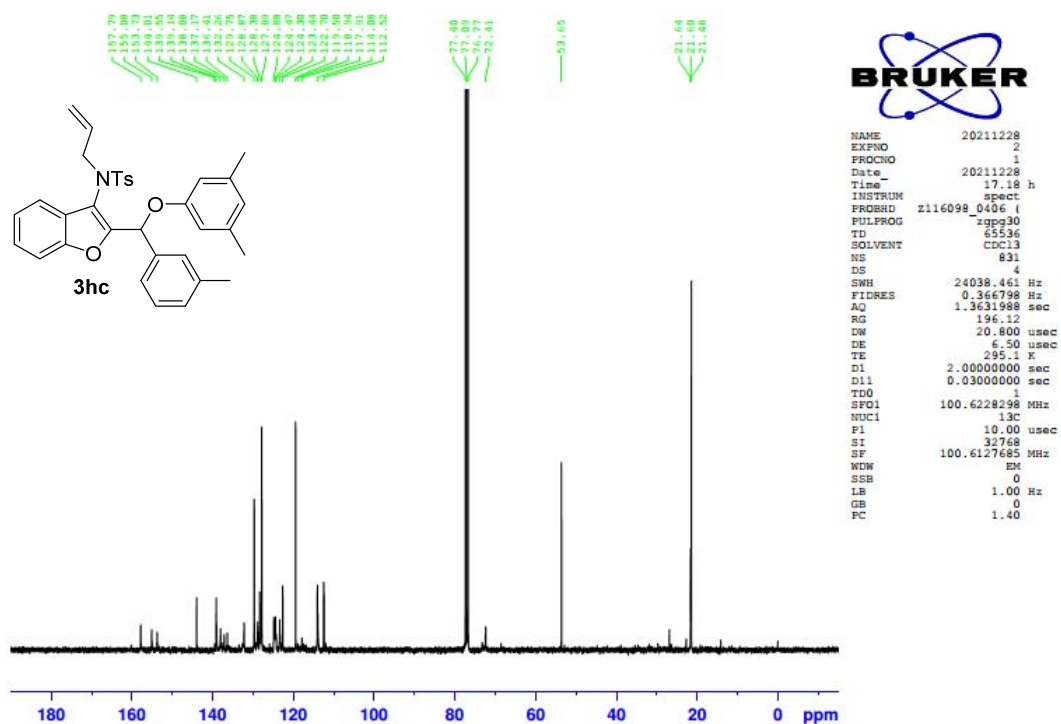



***N*-allyl-*N*-(2-((3,5-dimethylphenoxy)(3-methoxyphenyl)methyl)benzofuran-3-yl)-4-methylbenzenesulfonamide (3hd):**

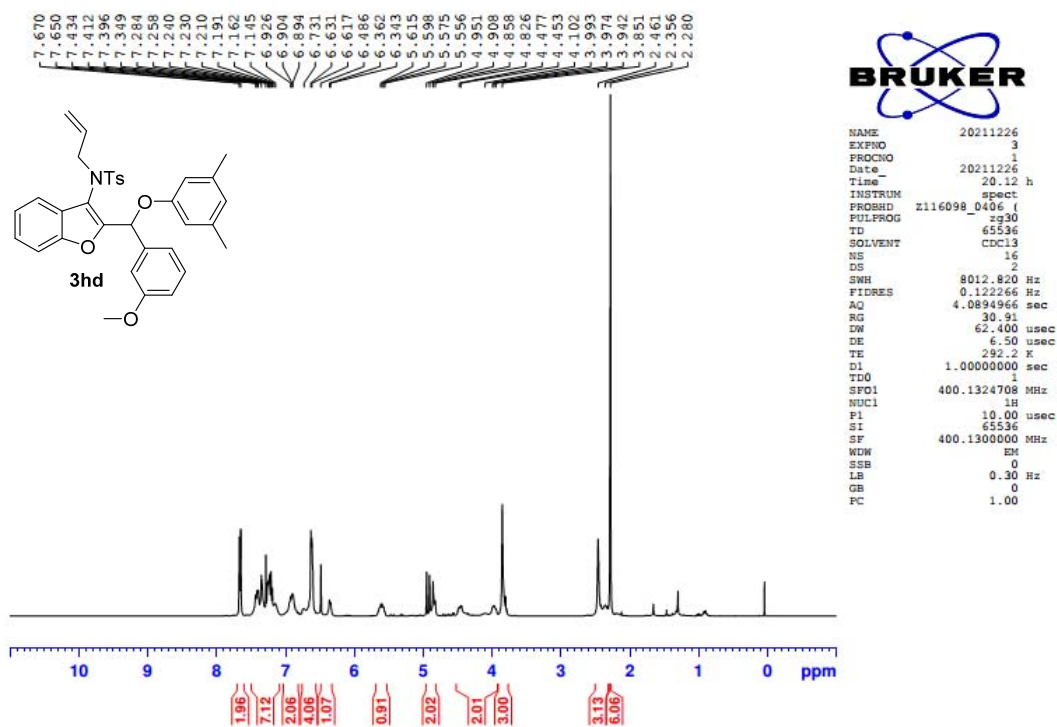

***N*-allyl-*N*-(2-((3,5-dimethylphenoxy)(3-methoxyphenyl)methyl)benzofuran-3-yl)-4-methylbenzenesulfonamide (3hd):**

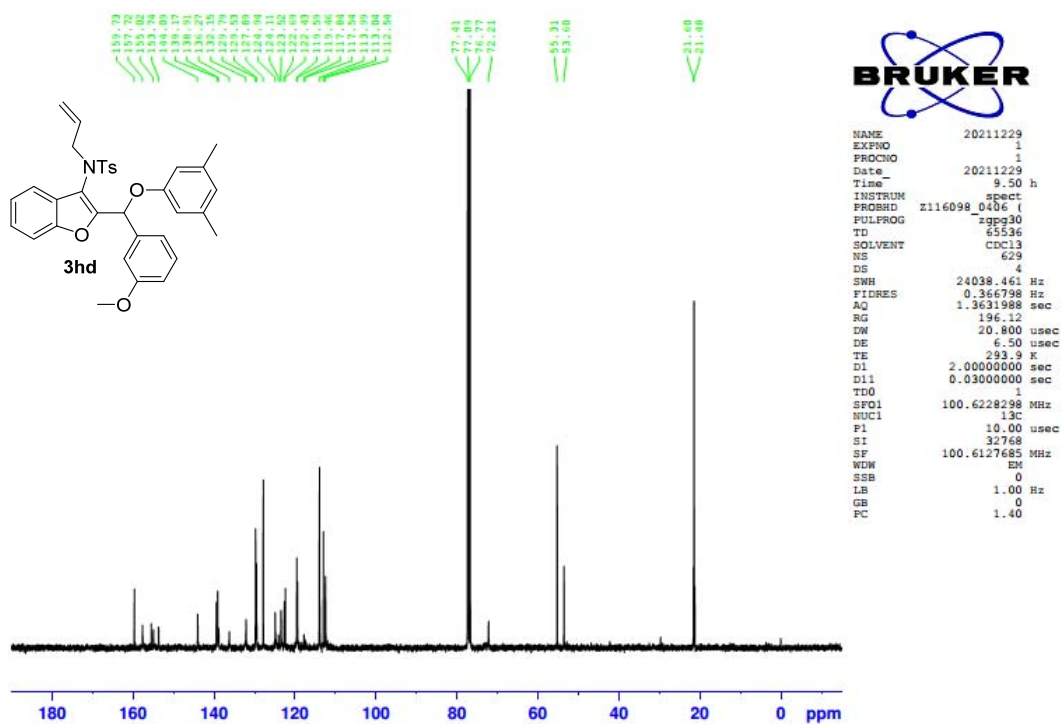

4-methyl-*N*-(2-(phenoxy(phenyl)methyl)benzofuran-3-yl)-*N*-propylbenzenesulfonamide (4)

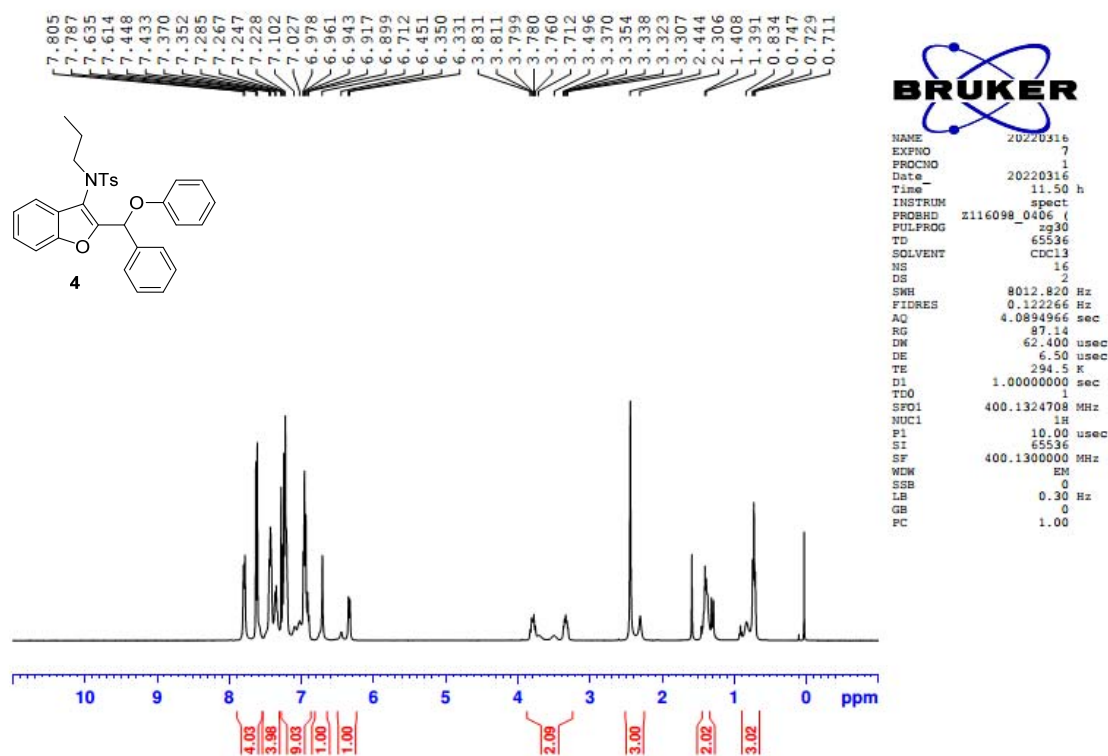

4-methyl-*N*-(2-(phenoxy(phenyl)methyl)benzofuran-3-yl)-*N*-propylbenzenesulfonamide (4)

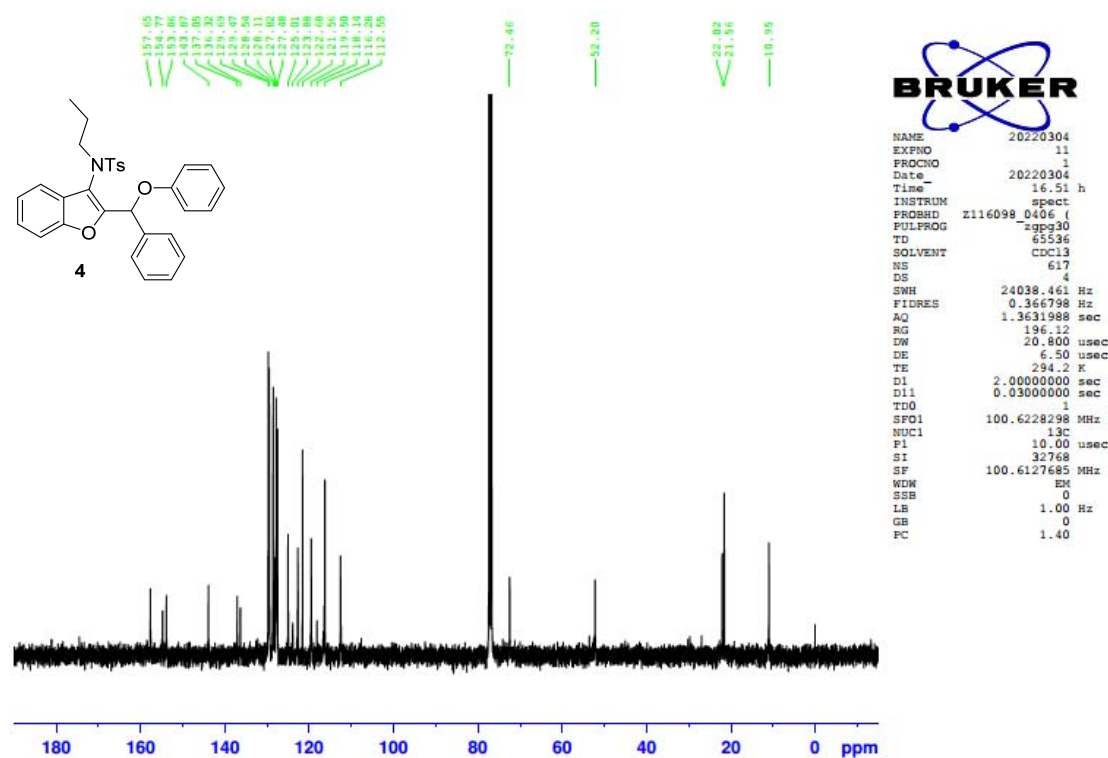



***N*-allyl-*N*-(2-((2-hydroxyphenyl)(phenoxy)methyl)benzofuran-3-yl)-4-methylbenzenesulfonamide (5):**

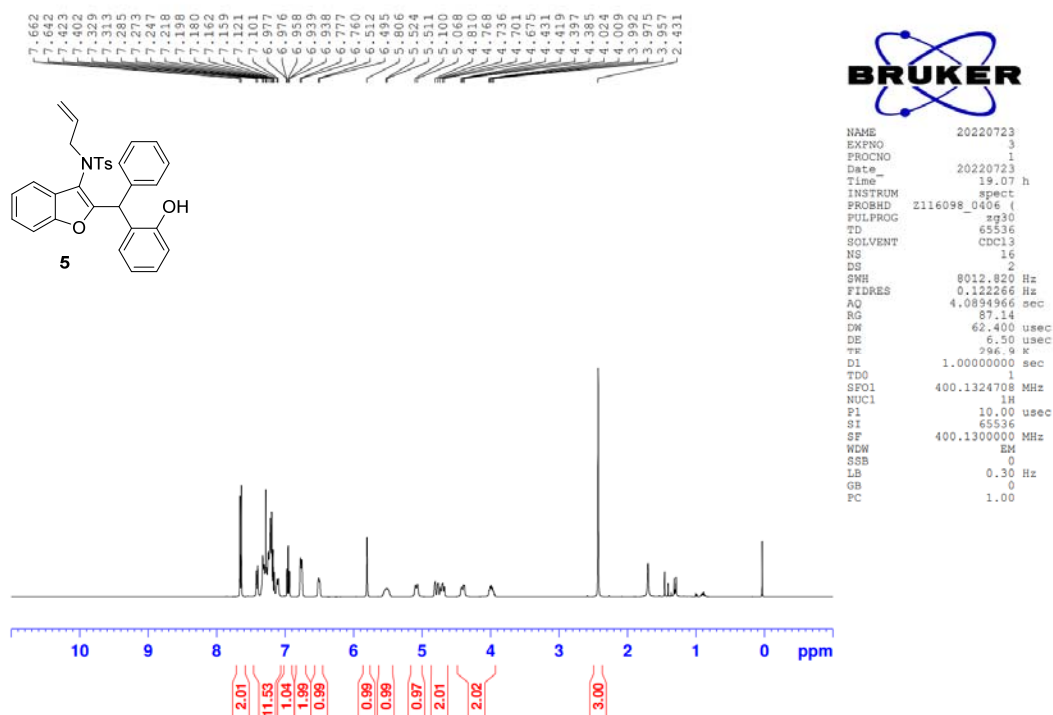

***N*-allyl-*N*-(2-((2-hydroxyphenyl)(phenoxy)methyl)benzofuran-3-yl)-4-methylbenzenesulfonamide (5):**

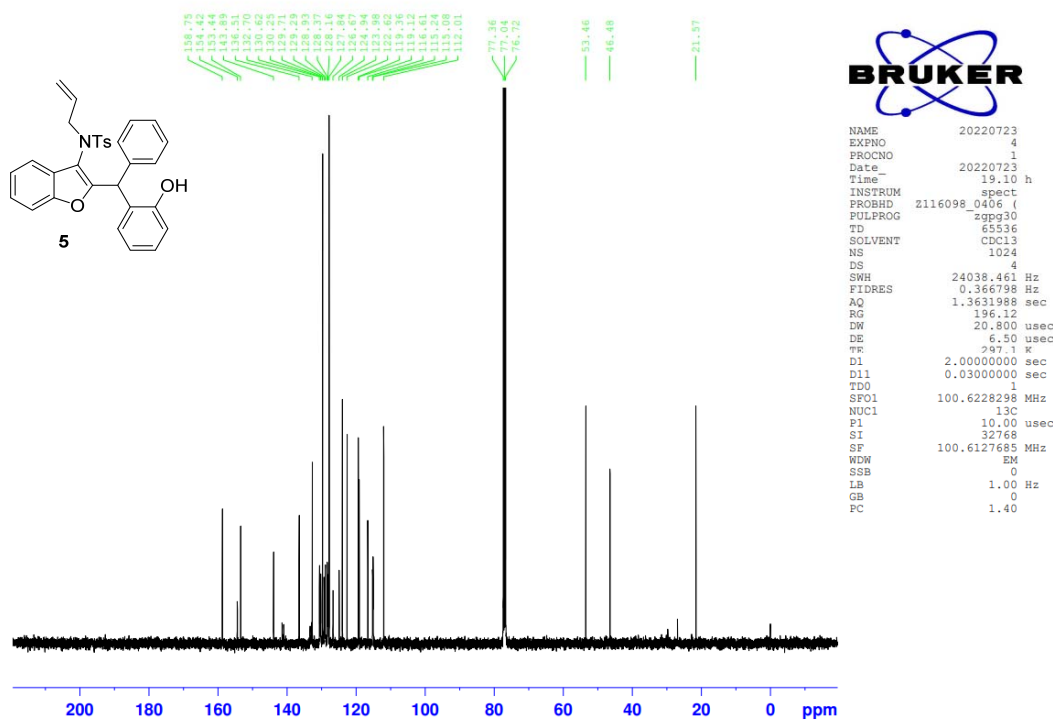

Supplement: d3ob00968h1.pdf [file d3ob00968h1.pdf]
